# Supplementary material for: Genome-wide identification and characterization of the CLASP_N gene family in upland cotton (Gossypium hirsutum L.)
Source: PeerJ. 2022 Jan 3;10:e12733. doi: 10.7717/peerj.12733 (PMC8734470; doi:10.7717/peerj.12733)
Supplement: Supplemental Information 1 [file peerj-10-12733-s001.xlsx]

## Sheet: Sheet1
Table S1 Primers of qRT-PCR for candidate genes
Gene name	GeneID	Forward primer	Reverse primer
Gh160250	D07G160250.1	GCACCTGTAAAGATTAGCCC	CATTTGAAACTTTGGGAACA
Gh208500	D07G208500.1	TTGGCTGTTATCGAGTTCGC	TACCGTTTGAGTGCCCGTCT
Gh140100	D01G140100.1	GATAATCCGTAGACTTTGTG	CATGCTGATATGCCTGTG
Gh210800	D08G210800.1	GCGGCTTACAAATCCACAT	AGACATACGCCCAGCTACA
Gh154000	A07G154000.2	CTCAAACCTGCACCTGTAA	GGAATCGGAATCATCTAAAA
Gh202300	A07G202300.1	AACATTGACATTAGGGAGGC	TATCAGCAAGGGTTGAAAGG
Gh192800	A08G192800.1	TGGCTTGCTAAGTTGACG	GGTTGATTCCTGGGTGGT
Gh147000	A01G147000.1	TGTAAGGCAAGATAATGGG	GCAAGTTTGAGTCGGATGT
Gh152100	A12G152100.2	TGCGTAATCTATCCGACAA	GTGGCAGCAGCTAAACCTA
Gh186000	D04G186000.1	AGTCAAGGGTGAACCAGAA	CAAAGTCTACGGATTATCAAAG
Gh309600	D05G309600.1	TGTGCCACCAGTGCTTAG	AATCTCCTCGGACAACCT
