# Supplementary material for: Genome-wide identification and characterization of the CLASP_N gene family in upland cotton (Gossypium hirsutum L.)
Source: PeerJ. 2022 Jan 3;10:e12733. doi: 10.7717/peerj.12733 (PMC8734470; doi:10.7717/peerj.12733)
Supplement: Supplemental Information 2 [file peerj-10-12733-s002.xlsx]

## Sheet: Sheet1
Table S2 Physicochemical information of the 16 CLASP_N genes in upland cotton
Gene name	Gene ID	mRNAID	Species	Chromosome	Start	End	Strand	exon	length（AA）	MW(Da)	pI	Subcellular localization	Functional Annotations	GO_annotation
Gh147000	Gohir.A01G147000.1	Gohir.A01G147000.1.v2.1	Gossypium hirsutum	1	87329576	87340417	-	21	721	80784.7	5.38	chloroplast	Thioredoxin-like fold	Biological Process: regulation of lipid kinase activity (GO:0043550);; Cellular Component: PAS complex (GO:0070772);;
Gh142700	Gohir.A04G142700.1	Gohir.A04G142700.1.v2.1	Gossypium hirsutum	4	88723006	88730022	-	21	716	80217.9	5.44	mitochondrion	Vacuole morphology and inheritance protein 14	Biological Process: regulation of lipid kinase activity (GO:0043550);; Cellular Component: PAS complex (GO:0070772);;
Gh308900	Gohir.A05G308900.2	Gohir.A05G308900.2.v2.1	Gossypium hirsutum	5	47966107	47975370	+	21	694	77664.4	5.49	chloroplast	Armadillo-like helical	Biological Process: regulation of lipid kinase activity (GO:0043550);; Cellular Component: PAS complex (GO:0070772);;
Gh154000	Gohir.A07G154000.2	Gohir.A07G154000.2.v2.1	Gossypium hirsutum	7	42885107	42897024	+	22	1487	165391	6.91	plasma membrane	Armadillo-type fold	--
Gh202300	Gohir.A07G202300.1	Gohir.A07G202300.1.v2.1	Gossypium hirsutum	7	93916203	93926153	-	22	1440	158895	7.17	cytoplasm	Armadillo-like helical	Cellular Component: spindle microtubule (GO:0005876);; Cellular Component: plasma membrane (GO:0005886);; Cellular Component: cell cortex (GO:0005938);; Biological Process: negative regulation of microtubule depolymerization (GO:0007026);; Biological Process: mitotic cell cycle (GO:0007067);; Cellular Component: plasmodesma (GO:0009506);; Cellular Component: phragmoplast (GO:0009524);; Biological…
Gh192800	Gohir.A08G192800.1	Gohir.A08G192800.1.v2.1	Gossypium hirsutum	8	119941402	119952010	+	22	1436	158986	6.76	nucleus	Armadillo-type fold	Cellular Component: spindle microtubule (GO:0005876);; Cellular Component: plasma membrane (GO:0005886);; Cellular Component: cell cortex (GO:0005938);; Biological Process: negative regulation of microtubule depolymerization (GO:0007026);; Biological Process: mitotic cell cycle (GO:0007067);; Cellular Component: plasmodesma (GO:0009506);; Cellular Component: phragmoplast (GO:0009524);; Biological…
Gh053900	Gohir.A09G053900.2	Gohir.A09G053900.2.v2.1	Gossypium hirsutum	9	49503037	49514145	-	22	1248	138985	7.11	chloroplast	Armadillo-type fold	--
Gh152100	Gohir.A12G152100.2	Gohir.A12G152100.2.v2.1	Gossypium hirsutum	12	92167325	92178635	-	21	723	81352.6	5.5	chloroplast	Vacuolar protein 14 C-terminal Fig4-binding domain	Biological Process: regulation of lipid kinase activity (GO:0043550);; Cellular Component: PAS complex (GO:0070772);;
Gh140100	Gohir.D01G140100.1	Gohir.D01G140100.1.v2.1	Gossypium hirsutum	15	44525221	44534389	+	21	721	80780.8	5.48	chloroplast	Vacuole morphology and inheritance protein 14	Biological Process: regulation of lipid kinase activity (GO:0043550);; Cellular Component: PAS complex (GO:0070772);;
Gh186000	Gohir.D04G186000.1	Gohir.D04G186000.1.v2.1	Gossypium hirsutum	22	57735559	57742627	-	22	715	80128.8	5.35	cytoplasm	Vacuole morphology and inheritance protein 14	--
Gh309600	Gohir.D05G309600.1	Gohir.D05G309600.1.v2.1	Gossypium hirsutum	19	37254995	37262260	+	21	694	77891.6	5.5	chloroplast	Armadillo-like helical	Biological Process: regulation of lipid kinase activity (GO:0043550);; Cellular Component: PAS complex (GO:0070772);;
Gh160200	Gohir.D07G160200.1	Gohir.D07G160200.1.v2.1	Gossypium hirsutum	16	29286028	29305188	+	21	1374	152007	6.68	chloroplast	Armadillo-type fold	Cellular Component: spindle microtubule (GO:0005876);; Cellular Component: plasma membrane (GO:0005886);; Cellular Component: cell cortex (GO:0005938);; Biological Process: negative regulation of microtubule depolymerization (GO:0007026);; Biological Process: mitotic cell cycle (GO:0007067);; Cellular Component: plasmodesma (GO:0009506);; Cellular Component: phragmoplast (GO:0009524);; Biological…
Gh160250	Gohir.D07G160250.1	Gohir.D07G160250.1.v2.1	Gossypium hirsutum	16	29294315	29297700	+	9	310	34045.2	4.68	cytoplasm	Armadillo-like helical	--
Gh208500	Gohir.D07G208500.1	Gohir.D07G208500.1.v2.1	Gossypium hirsutum	16	54618166	54628054	-	21	1440	159066	6.7	nucleus	Armadillo-type fold	Cellular Component: spindle microtubule (GO:0005876);; Cellular Component: plasma membrane (GO:0005886);; Cellular Component: cell cortex (GO:0005938);; Biological Process: negative regulation of microtubule depolymerization (GO:0007026);; Biological Process: mitotic cell cycle (GO:0007067);; Cellular Component: plasmodesma (GO:0009506);; Cellular Component: phragmoplast (GO:0009524);; Biological…
Gh210800	Gohir.D08G210800.1	Gohir.D08G210800.1.v2.1	Gossypium hirsutum	24	62548756	62559339	+	22	1436	158889	7	cytoplasm	Armadillo-like helical	Cellular Component: spindle microtubule (GO:0005876);; Cellular Component: plasma membrane (GO:0005886);; Cellular Component: cell cortex (GO:0005938);; Biological Process: negative regulation of microtubule depolymerization (GO:0007026);; Biological Process: mitotic cell cycle (GO:0007067);; Cellular Component: plasmodesma (GO:0009506);; Cellular Component: phragmoplast (GO:0009524);; Biological…
Gh053074	Gohir.D09G053074.1	Gohir.D09G053074.1.v2.1	Gossypium hirsutum	23	27627481	27638586	-	22	1257	140281	7.12	chloroplast	Armadillo-type fold	--
