# Supplementary material for: Genome-wide identification and characterization of the CLASP_N gene family in upland cotton (Gossypium hirsutum L.)
Source: PeerJ. 2022 Jan 3;10:e12733. doi: 10.7717/peerj.12733 (PMC8734470; doi:10.7717/peerj.12733)
Supplement: Supplemental Information 3 [file peerj-10-12733-s003.xlsx]

## Sheet: Sheet1
Table S3 Tandem repeat genes of CLASP_N family in Upland cotton
GeneID
Gohir.A01G147000:Gohir.D01G140100
Gohir.A01G147000:Gohir.D05G309600
Gohir.A04G142700:Gohir.D04G186000
Gohir.A07G202300:Gohir.A08G192800
Gohir.A07G202300:Gohir.D07G160200
Gohir.A07G202300:Gohir.D07G208500
Gohir.A07G202300:Gohir.D08G210800
Gohir.A08G192800:Gohir.D07G208500
Gohir.A08G192800:Gohir.D08G210800
Gohir.D04G186000:Gohir.D05G309600
Gohir.D07G160200:Gohir.D07G208500
Gohir.D07G208500:Gohir.D08G210800
