# Supplementary material for: Genome-wide identification and characterization of the CLASP_N gene family in upland cotton (Gossypium hirsutum L.)
Source: PeerJ. 2022 Jan 3;10:e12733. doi: 10.7717/peerj.12733 (PMC8734470; doi:10.7717/peerj.12733)
Supplement: Supplemental Information 4 [file peerj-10-12733-s004.xlsx]

## Sheet: Sheet1
Table S4 Analysis of cis-acting elements of 16 CLASP_N genes in upland cotton
Gene ID	Start	End	Cis-acting element
Gohir.A01G147000.1	827	836	GATA-motif
Gohir.A01G147000.1	1130	1136	MYB-like sequence
Gohir.A01G147000.1	590	596	AT~TATA-box
Gohir.A01G147000.1	528	534	MYB
Gohir.A01G147000.1	1130	1136	MYB
Gohir.A01G147000.1	782	790	RY-element
Gohir.A01G147000.1	1055	1062	GT1-motif
Gohir.A01G147000.1	1448	1455	GT1-motif
Gohir.A01G147000.1	1250	1258	ERE
Gohir.A01G147000.1	1355	1363	ERE
Gohir.A01G147000.1	590	596	TATA-box
Gohir.A01G147000.1	591	597	TATA-box
Gohir.A01G147000.1	592	596	TATA-box
Gohir.A01G147000.1	704	708	TATA-box
Gohir.A01G147000.1	799	803	TATA-box
Gohir.A01G147000.1	987	991	TATA-box
Gohir.A01G147000.1	1097	1105	TATA-box
Gohir.A01G147000.1	1103	1108	TATA-box
Gohir.A01G147000.1	1105	1109	TATA-box
Gohir.A01G147000.1	227	233	LTR
Gohir.A01G147000.1	54	60	MYC
Gohir.A01G147000.1	453	459	MYC
Gohir.A01G147000.1	1169	1175	MYC
Gohir.A01G147000.1	330	339	CTAG-motif
Gohir.A01G147000.1	384	390	TCT-motif
Gohir.A01G147000.1	397	403	TCT-motif
Gohir.A01G147000.1	177	182	STRE
Gohir.A01G147000.1	345	350	STRE
Gohir.A01G147000.1	1383	1392	I-box
Gohir.A01G147000.1	1386	1394	I-box
Gohir.A01G147000.1	431	439	CARE
Gohir.A01G147000.1	64	70	W box
Gohir.A01G147000.1	673	679	W box
Gohir.A01G147000.1	50	55	CAAT-box
Gohir.A01G147000.1	85	89	CAAT-box
Gohir.A01G147000.1	107	112	CAAT-box
Gohir.A01G147000.1	282	286	CAAT-box
Gohir.A01G147000.1	391	396	CAAT-box
Gohir.A01G147000.1	390	394	CAAT-box
Gohir.A01G147000.1	459	464	CAAT-box
Gohir.A01G147000.1	644	649	CAAT-box
Gohir.A01G147000.1	658	662	CAAT-box
Gohir.A01G147000.1	682	687	CAAT-box
Gohir.A01G147000.1	694	698	CAAT-box
Gohir.A01G147000.1	719	724	CAAT-box
Gohir.A01G147000.1	731	735	CAAT-box
Gohir.A01G147000.1	964	968	CAAT-box
Gohir.A01G147000.1	971	975	CAAT-box
Gohir.A01G147000.1	1142	1146	CAAT-box
Gohir.A01G147000.1	1162	1166	CAAT-box
Gohir.A01G147000.1	1175	1179	CAAT-box
Gohir.A01G147000.1	1173	1177	CAAT-box
Gohir.A01G147000.1	1204	1209	CAAT-box
Gohir.A01G147000.1	1227	1231	CAAT-box
Gohir.A01G147000.1	1297	1301	CAAT-box
Gohir.A01G147000.1	1317	1322	CAAT-box
Gohir.A01G147000.1	1372	1377	CAAT-box
Gohir.A01G147000.1	1373	1377	CAAT-box
Gohir.A01G147000.1	1415	1419	CAAT-box
Gohir.A01G147000.1	1448	1453	CAAT-box
Gohir.A04G142700.1	463	470	MRE
Gohir.A04G142700.1	1157	1164	GT1-motif
Gohir.A04G142700.1	1236	1242	ARE
Gohir.A04G142700.1	610	616	MYC
Gohir.A04G142700.1	795	804	WUN-motif
Gohir.A04G142700.1	1371	1379	WUN-motif
Gohir.A04G142700.1	210	218	ERE
Gohir.A04G142700.1	217	225	ERE
Gohir.A04G142700.1	406	414	ERE
Gohir.A04G142700.1	727	735	ERE
Gohir.A04G142700.1	818	826	ERE
Gohir.A04G142700.1	982	990	ERE
Gohir.A04G142700.1	1229	1237	ERE
Gohir.A04G142700.1	1480	1488	ERE
Gohir.A04G142700.1	927	936	TCA-element
Gohir.A04G142700.1	1	5	TATA-box
Gohir.A04G142700.1	106	114	TATA-box
Gohir.A04G142700.1	266	272	TATA-box
Gohir.A04G142700.1	267	271	TATA-box
Gohir.A04G142700.1	404	410	TATA-box
Gohir.A04G142700.1	405	411	TATA-box
Gohir.A04G142700.1	406	412	TATA-box
Gohir.A04G142700.1	407	411	TATA-box
Gohir.A04G142700.1	531	535	TATA-box
Gohir.A04G142700.1	596	600	TATA-box
Gohir.A04G142700.1	702	708	TATA-box
Gohir.A04G142700.1	698	703	TATA-box
Gohir.A04G142700.1	704	708	TATA-box
Gohir.A04G142700.1	712	718	TATA-box
Gohir.A04G142700.1	708	713	TATA-box
Gohir.A04G142700.1	714	718	TATA-box
Gohir.A04G142700.1	733	741	TATA-box
Gohir.A04G142700.1	857	863	TATA-box
Gohir.A04G142700.1	859	864	TATA-box
Gohir.A04G142700.1	861	865	TATA-box
Gohir.A04G142700.1	870	876	TATA-box
Gohir.A04G142700.1	866	871	TATA-box
Gohir.A04G142700.1	868	872	TATA-box
Gohir.A04G142700.1	914	920	TATA-box
Gohir.A04G142700.1	910	915	TATA-box
Gohir.A04G142700.1	912	916	TATA-box
Gohir.A04G142700.1	1133	1139	TATA-box
Gohir.A04G142700.1	1127	1134	TATA-box
Gohir.A04G142700.1	1129	1135	TATA-box
Gohir.A04G142700.1	1133	1137	TATA-box
Gohir.A04G142700.1	1187	1193	TATA-box
Gohir.A04G142700.1	1184	1188	TATA-box
Gohir.A04G142700.1	1186	1192	TATA-box
Gohir.A04G142700.1	1187	1193	TATA-box
Gohir.A04G142700.1	1194	1200	TATA-box
Gohir.A04G142700.1	1191	1195	TATA-box
Gohir.A04G142700.1	1220	1226	TATA-box
Gohir.A04G142700.1	1216	1221	TATA-box
Gohir.A04G142700.1	1218	1222	TATA-box
Gohir.A04G142700.1	1293	1300	TATA-box
Gohir.A04G142700.1	833	839	W box
Gohir.A04G142700.1	319	325	TCT-motif
Gohir.A04G142700.1	108	112	CAAT-box
Gohir.A04G142700.1	126	130	CAAT-box
Gohir.A04G142700.1	195	199	CAAT-box
Gohir.A04G142700.1	274	279	CAAT-box
Gohir.A04G142700.1	316	320	CAAT-box
Gohir.A04G142700.1	385	390	CAAT-box
Gohir.A04G142700.1	459	464	CAAT-box
Gohir.A04G142700.1	539	544	CAAT-box
Gohir.A04G142700.1	606	611	CAAT-box
Gohir.A04G142700.1	619	623	CAAT-box
Gohir.A04G142700.1	641	645	CAAT-box
Gohir.A04G142700.1	828	832	CAAT-box
Gohir.A04G142700.1	917	921	CAAT-box
Gohir.A04G142700.1	927	931	CAAT-box
Gohir.A04G142700.1	950	954	CAAT-box
Gohir.A04G142700.1	957	962	CAAT-box
Gohir.A04G142700.1	967	971	CAAT-box
Gohir.A04G142700.1	1058	1063	CAAT-box
Gohir.A04G142700.1	1108	1113	CAAT-box
Gohir.A04G142700.1	1130	1135	CAAT-box
Gohir.A04G142700.1	1147	1151	CAAT-box
Gohir.A04G142700.1	1179	1183	CAAT-box
Gohir.A04G142700.1	1260	1264	CAAT-box
Gohir.A04G142700.1	1282	1286	CAAT-box
Gohir.A04G142700.1	1339	1344	CAAT-box
Gohir.A04G142700.1	1378	1383	CAAT-box
Gohir.A04G142700.1	1464	1468	CAAT-box
Gohir.A04G142700.1	714	722	TATA
Gohir.A04G142700.1	446	453	AAGAA-motif
Gohir.A04G142700.1	569	580	Box III
Gohir.A04G142700.1	296	302	Myb-binding site
Gohir.A04G142700.1	479	485	Myb-binding site
Gohir.A04G142700.1	296	302	MYB
Gohir.A04G142700.1	479	485	MYB
Gohir.A04G142700.1	607	614	GCN4_motif
Gohir.A04G142700.1	623	629	G-Box
Gohir.A04G142700.1	1393	1399	G-Box
Gohir.A04G142700.1	784	790	Myb
Gohir.A04G142700.1	982	992	F-box
Gohir.A04G142700.1	1080	1086	WRE3
Gohir.A04G142700.1	1325	1331	LTR
Gohir.A04G142700.1	800	809	CTAG-motif
Gohir.A04G142700.1	1233	1242	O2-site
Gohir.A04G142700.1	183	189	Box 4
Gohir.A04G142700.1	192	198	Box 4
Gohir.A04G142700.1	386	392	Box 4
Gohir.A04G142700.1	869	875	Box 4
Gohir.A04G142700.1	1278	1284	Box 4
Gohir.A04G142700.1	1301	1307	Box 4
Gohir.A04G142700.1	1311	1317	Box 4
Gohir.A04G142700.1	405	411	AT~TATA-box
Gohir.A04G142700.1	1129	1135	AT~TATA-box
Gohir.A04G142700.1	1187	1193	AT~TATA-box
Gohir.A04G142700.1	618	623	ABRE
Gohir.A04G142700.1	1400	1405	ABRE
Gohir.A05G308900.2	4	9	CAAT-box
Gohir.A05G308900.2	67	72	CAAT-box
Gohir.A05G308900.2	78	83	CAAT-box
Gohir.A05G308900.2	131	136	CAAT-box
Gohir.A05G308900.2	206	211	CAAT-box
Gohir.A05G308900.2	204	209	CAAT-box
Gohir.A05G308900.2	219	224	CAAT-box
Gohir.A05G308900.2	267	271	CAAT-box
Gohir.A05G308900.2	368	373	CAAT-box
Gohir.A05G308900.2	427	432	CAAT-box
Gohir.A05G308900.2	462	467	CAAT-box
Gohir.A05G308900.2	480	484	CAAT-box
Gohir.A05G308900.2	508	513	CAAT-box
Gohir.A05G308900.2	509	513	CAAT-box
Gohir.A05G308900.2	644	648	CAAT-box
Gohir.A05G308900.2	670	674	CAAT-box
Gohir.A05G308900.2	735	740	CAAT-box
Gohir.A05G308900.2	736	740	CAAT-box
Gohir.A05G308900.2	803	807	CAAT-box
Gohir.A05G308900.2	960	964	CAAT-box
Gohir.A05G308900.2	1174	1178	CAAT-box
Gohir.A05G308900.2	1197	1201	CAAT-box
Gohir.A05G308900.2	1290	1295	CAAT-box
Gohir.A05G308900.2	1382	1387	CAAT-box
Gohir.A05G308900.2	694	707	AT1-motif
Gohir.A05G308900.2	1202	1215	AT1-motif
Gohir.A05G308900.2	942	947	CGTCA-motif
Gohir.A05G308900.2	323	331	ERE
Gohir.A05G308900.2	623	631	ERE
Gohir.A05G308900.2	648	656	ERE
Gohir.A05G308900.2	838	846	ERE
Gohir.A05G308900.2	853	861	ERE
Gohir.A05G308900.2	927	935	ERE
Gohir.A05G308900.2	1012	1020	ERE
Gohir.A05G308900.2	1071	1079	ERE
Gohir.A05G308900.2	1096	1104	ERE
Gohir.A05G308900.2	1090	1098	ERE
Gohir.A05G308900.2	1112	1120	ERE
Gohir.A05G308900.2	1358	1366	ERE
Gohir.A05G308900.2	9	14	TATA-box
Gohir.A05G308900.2	15	19	TATA-box
Gohir.A05G308900.2	69	75	TATA-box
Gohir.A05G308900.2	77	81	TATA-box
Gohir.A05G308900.2	99	106	TATA-box
Gohir.A05G308900.2	224	230	TATA-box
Gohir.A05G308900.2	220	225	TATA-box
Gohir.A05G308900.2	226	230	TATA-box
Gohir.A05G308900.2	392	398	TATA-box
Gohir.A05G308900.2	393	397	TATA-box
Gohir.A05G308900.2	397	403	TATA-box
Gohir.A05G308900.2	398	402	TATA-box
Gohir.A05G308900.2	407	414	TATA-box
Gohir.A05G308900.2	409	415	TATA-box
Gohir.A05G308900.2	411	416	TATA-box
Gohir.A05G308900.2	417	421	TATA-box
Gohir.A05G308900.2	492	498	TATA-box
Gohir.A05G308900.2	494	499	TATA-box
Gohir.A05G308900.2	500	504	TATA-box
Gohir.A05G308900.2	560	567	TATA-box
Gohir.A05G308900.2	562	568	TATA-box
Gohir.A05G308900.2	564	569	TATA-box
Gohir.A05G308900.2	570	574	TATA-box
Gohir.A05G308900.2	593	601	TATA-box
Gohir.A05G308900.2	654	662	TATA-box
Gohir.A05G308900.2	672	678	TATA-box
Gohir.A05G308900.2	673	677	TATA-box
Gohir.A05G308900.2	689	695	TATA-box
Gohir.A05G308900.2	697	701	TATA-box
Gohir.A05G308900.2	771	775	TATA-box
Gohir.A05G308900.2	826	832	TATA-box
Gohir.A05G308900.2	828	833	TATA-box
Gohir.A05G308900.2	830	834	TATA-box
Gohir.A05G308900.2	899	903	TATA-box
Gohir.A05G308900.2	907	913	TATA-box
Gohir.A05G308900.2	911	915	TATA-box
Gohir.A05G308900.2	1002	1008	TATA-box
Gohir.A05G308900.2	999	1003	TATA-box
Gohir.A05G308900.2	1018	1026	TATA-box
Gohir.A05G308900.2	1147	1154	TATA-box
Gohir.A05G308900.2	1149	1155	TATA-box
Gohir.A05G308900.2	1151	1156	TATA-box
Gohir.A05G308900.2	1153	1157	TATA-box
Gohir.A05G308900.2	1201	1208	TATA-box
Gohir.A05G308900.2	1203	1209	TATA-box
Gohir.A05G308900.2	1205	1210	TATA-box
Gohir.A05G308900.2	1207	1211	TATA-box
Gohir.A05G308900.2	1226	1232	TATA-box
Gohir.A05G308900.2	1222	1227	TATA-box
Gohir.A05G308900.2	1224	1228	TATA-box
Gohir.A05G308900.2	1290	1296	TATA-box
Gohir.A05G308900.2	1286	1291	TATA-box
Gohir.A05G308900.2	1288	1292	TATA-box
Gohir.A05G308900.2	1302	1307	TATA-box
Gohir.A05G308900.2	1304	1308	TATA-box
Gohir.A05G308900.2	1320	1325	TATA-box
Gohir.A05G308900.2	1322	1326	TATA-box
Gohir.A05G308900.2	947	952	as-1
Gohir.A05G308900.2	82	88	MYC
Gohir.A05G308900.2	514	523	WUN-motif
Gohir.A05G308900.2	852	860	WUN-motif
Gohir.A05G308900.2	732	738	ARE
Gohir.A05G308900.2	430	438	GA-motif
Gohir.A05G308900.2	1100	1109	AT-rich sequence
Gohir.A05G308900.2	5	11	MYB
Gohir.A05G308900.2	5	11	MYB-like sequence
Gohir.A05G308900.2	1199	1207	TATA
Gohir.A05G308900.2	513	522	O2-site
Gohir.A05G308900.2	947	952	TGACG-motif
Gohir.A05G308900.2	949	954	ABRE
Gohir.A05G308900.2	68	74	Box 4
Gohir.A05G308900.2	1400	1406	Box 4
Gohir.A05G308900.2	1464	1470	Box 4
Gohir.A05G308900.2	942	948	G-box
Gohir.A07G154000.2	475	484	ATCT-motif
Gohir.A07G154000.2	620	629	ATCT-motif
Gohir.A07G154000.2	66	72	MYB recognition site
Gohir.A07G154000.2	108	115	TCCC-motif
Gohir.A07G154000.2	327	334	TCCC-motif
Gohir.A07G154000.2	415	422	TCCC-motif
Gohir.A07G154000.2	655	662	TCCC-motif
Gohir.A07G154000.2	699	706	TCCC-motif
Gohir.A07G154000.2	743	750	TCCC-motif
Gohir.A07G154000.2	91	101	GATA-motif
Gohir.A07G154000.2	222	232	GATA-motif
Gohir.A07G154000.2	265	276	GATA-motif
Gohir.A07G154000.2	310	320	GATA-motif
Gohir.A07G154000.2	354	364	GATA-motif
Gohir.A07G154000.2	398	408	GATA-motif
Gohir.A07G154000.2	449	459	GATA-motif
Gohir.A07G154000.2	594	604	GATA-motif
Gohir.A07G154000.2	770	780	GATA-motif
Gohir.A07G154000.2	72	78	CCAAT-box
Gohir.A07G154000.2	1220	1226	MBS
Gohir.A07G154000.2	947	953	G-box
Gohir.A07G154000.2	1168	1177	I-box
Gohir.A07G154000.2	1323	1329	LTR
Gohir.A07G154000.2	1237	1243	WRE3
Gohir.A07G154000.2	1220	1226	Myb
Gohir.A07G154000.2	968	974	CAT-box
Gohir.A07G154000.2	1231	1237	MYB
Gohir.A07G154000.2	49	54	CAAT-box
Gohir.A07G154000.2	79	83	CAAT-box
Gohir.A07G154000.2	99	104	CAAT-box
Gohir.A07G154000.2	173	178	CAAT-box
Gohir.A07G154000.2	260	264	CAAT-box
Gohir.A07G154000.2	274	279	CAAT-box
Gohir.A07G154000.2	360	369	CAAT-box
Gohir.A07G154000.2	362	367	CAAT-box
Gohir.A07G154000.2	392	396	CAAT-box
Gohir.A07G154000.2	406	411	CAAT-box
Gohir.A07G154000.2	457	462	CAAT-box
Gohir.A07G154000.2	487	491	CAAT-box
Gohir.A07G154000.2	602	607	CAAT-box
Gohir.A07G154000.2	617	621	CAAT-box
Gohir.A07G154000.2	632	636	CAAT-box
Gohir.A07G154000.2	676	680	CAAT-box
Gohir.A07G154000.2	719	724	CAAT-box
Gohir.A07G154000.2	734	739	CAAT-box
Gohir.A07G154000.2	764	768	CAAT-box
Gohir.A07G154000.2	778	783	CAAT-box
Gohir.A07G154000.2	845	849	CAAT-box
Gohir.A07G154000.2	892	897	CAAT-box
Gohir.A07G154000.2	909	914	CAAT-box
Gohir.A07G154000.2	912	917	CAAT-box
Gohir.A07G154000.2	981	989	CAAT-box
Gohir.A07G154000.2	982	987	CAAT-box
Gohir.A07G154000.2	983	987	CAAT-box
Gohir.A07G154000.2	1060	1065	CAAT-box
Gohir.A07G154000.2	1115	1120	CAAT-box
Gohir.A07G154000.2	1265	1270	CAAT-box
Gohir.A07G154000.2	1311	1315	CAAT-box
Gohir.A07G154000.2	1483	1488	CAAT-box
Gohir.A07G154000.2	1350	1364	AT1-motif
Gohir.A07G154000.2	461	467	TCT-motif
Gohir.A07G154000.2	164	170	W box
Gohir.A07G154000.2	1351	1359	ERE
Gohir.A07G154000.2	1448	1456	ERE
Gohir.A07G154000.2	1452	1461	TCA-element
Gohir.A07G154000.2	32	38	TATA-box
Gohir.A07G154000.2	33	37	TATA-box
Gohir.A07G154000.2	143	148	TATA-box
Gohir.A07G154000.2	149	153	TATA-box
Gohir.A07G154000.2	508	512	TATA-box
Gohir.A07G154000.2	682	687	TATA-box
Gohir.A07G154000.2	688	692	TATA-box
Gohir.A07G154000.2	1240	1249	TATA-box
Gohir.A07G154000.2	1242	1249	TATA-box
Gohir.A07G154000.2	1332	1341	TATA-box
Gohir.A07G154000.2	1330	1334	TATA-box
Gohir.A07G154000.2	43	49	ARE
Gohir.A07G154000.2	1453	1459	ARE
Gohir.A07G154000.2	903	909	MYC
Gohir.A07G154000.2	1109	1115	MYC
Gohir.A07G154000.2	1373	1382	WUN-motif
Gohir.A07G154000.2	1381	1390	WUN-motif
Gohir.A07G202300.1	378	383	STRE
Gohir.A07G202300.1	444	450	Myb
Gohir.A07G202300.1	480	486	Myb
Gohir.A07G202300.1	716	722	MYB recognition site
Gohir.A07G202300.1	766	771	ABRE
Gohir.A07G202300.1	787	792	ABRE
Gohir.A07G202300.1	791	800	ABRE
Gohir.A07G202300.1	935	941	AT~TATA-box
Gohir.A07G202300.1	1305	1311	AT~TATA-box
Gohir.A07G202300.1	710	716	CCAAT-box
Gohir.A07G202300.1	765	771	G-box
Gohir.A07G202300.1	790	801	G-box
Gohir.A07G202300.1	444	450	MBS
Gohir.A07G202300.1	705	711	Box 4
Gohir.A07G202300.1	110	114	CAAT-box
Gohir.A07G202300.1	123	127	CAAT-box
Gohir.A07G202300.1	195	200	CAAT-box
Gohir.A07G202300.1	217	221	CAAT-box
Gohir.A07G202300.1	240	244	CAAT-box
Gohir.A07G202300.1	237	242	CAAT-box
Gohir.A07G202300.1	288	292	CAAT-box
Gohir.A07G202300.1	317	321	CAAT-box
Gohir.A07G202300.1	315	319	CAAT-box
Gohir.A07G202300.1	359	364	CAAT-box
Gohir.A07G202300.1	375	379	CAAT-box
Gohir.A07G202300.1	403	407	CAAT-box
Gohir.A07G202300.1	401	405	CAAT-box
Gohir.A07G202300.1	407	414	CAAT-box
Gohir.A07G202300.1	426	431	CAAT-box
Gohir.A07G202300.1	578	582	CAAT-box
Gohir.A07G202300.1	772	776	CAAT-box
Gohir.A07G202300.1	888	893	CAAT-box
Gohir.A07G202300.1	907	911	CAAT-box
Gohir.A07G202300.1	951	955	CAAT-box
Gohir.A07G202300.1	959	963	CAAT-box
Gohir.A07G202300.1	1001	1006	CAAT-box
Gohir.A07G202300.1	1065	1069	CAAT-box
Gohir.A07G202300.1	1075	1079	CAAT-box
Gohir.A07G202300.1	1115	1119	CAAT-box
Gohir.A07G202300.1	1128	1132	CAAT-box
Gohir.A07G202300.1	1270	1274	CAAT-box
Gohir.A07G202300.1	1281	1285	CAAT-box
Gohir.A07G202300.1	1325	1329	CAAT-box
Gohir.A07G202300.1	1334	1338	CAAT-box
Gohir.A07G202300.1	770	779	TC-rich repeats
Gohir.A07G202300.1	773	779	TCT-motif
Gohir.A07G202300.1	453	459	W box
Gohir.A07G202300.1	1103	1109	W box
Gohir.A07G202300.1	248	256	TATA-box
Gohir.A07G202300.1	325	333	TATA-box
Gohir.A07G202300.1	336	342	TATA-box
Gohir.A07G202300.1	344	348	TATA-box
Gohir.A07G202300.1	535	541	TATA-box
Gohir.A07G202300.1	531	536	TATA-box
Gohir.A07G202300.1	537	541	TATA-box
Gohir.A07G202300.1	551	558	TATA-box
Gohir.A07G202300.1	553	559	TATA-box
Gohir.A07G202300.1	555	560	TATA-box
Gohir.A07G202300.1	561	565	TATA-box
Gohir.A07G202300.1	586	592	TATA-box
Gohir.A07G202300.1	587	591	TATA-box
Gohir.A07G202300.1	596	604	TATA-box
Gohir.A07G202300.1	624	630	TATA-box
Gohir.A07G202300.1	625	629	TATA-box
Gohir.A07G202300.1	636	643	TATA-box
Gohir.A07G202300.1	643	649	TATA-box
Gohir.A07G202300.1	644	648	TATA-box
Gohir.A07G202300.1	664	670	TATA-box
Gohir.A07G202300.1	660	665	TATA-box
Gohir.A07G202300.1	666	670	TATA-box
Gohir.A07G202300.1	673	679	TATA-box
Gohir.A07G202300.1	669	674	TATA-box
Gohir.A07G202300.1	675	679	TATA-box
Gohir.A07G202300.1	831	837	TATA-box
Gohir.A07G202300.1	827	832	TATA-box
Gohir.A07G202300.1	829	833	TATA-box
Gohir.A07G202300.1	842	848	TATA-box
Gohir.A07G202300.1	838	843	TATA-box
Gohir.A07G202300.1	840	844	TATA-box
Gohir.A07G202300.1	865	872	TATA-box
Gohir.A07G202300.1	867	873	TATA-box
Gohir.A07G202300.1	869	874	TATA-box
Gohir.A07G202300.1	871	875	TATA-box
Gohir.A07G202300.1	885	892	TATA-box
Gohir.A07G202300.1	887	893	TATA-box
Gohir.A07G202300.1	889	894	TATA-box
Gohir.A07G202300.1	891	895	TATA-box
Gohir.A07G202300.1	906	913	TATA-box
Gohir.A07G202300.1	908	914	TATA-box
Gohir.A07G202300.1	910	915	TATA-box
Gohir.A07G202300.1	912	916	TATA-box
Gohir.A07G202300.1	925	931	TATA-box
Gohir.A07G202300.1	927	932	TATA-box
Gohir.A07G202300.1	929	933	TATA-box
Gohir.A07G202300.1	934	940	TATA-box
Gohir.A07G202300.1	935	941	TATA-box
Gohir.A07G202300.1	936	942	TATA-box
Gohir.A07G202300.1	939	943	TATA-box
Gohir.A07G202300.1	961	967	TATA-box
Gohir.A07G202300.1	958	962	TATA-box
Gohir.A07G202300.1	959	966	TATA-box
Gohir.A07G202300.1	961	967	TATA-box
Gohir.A07G202300.1	963	968	TATA-box
Gohir.A07G202300.1	965	969	TATA-box
Gohir.A07G202300.1	974	983	TATA-box
Gohir.A07G202300.1	979	986	TATA-box
Gohir.A07G202300.1	981	987	TATA-box
Gohir.A07G202300.1	983	988	TATA-box
Gohir.A07G202300.1	985	989	TATA-box
Gohir.A07G202300.1	1027	1035	TATA-box
Gohir.A07G202300.1	1033	1038	TATA-box
Gohir.A07G202300.1	1035	1039	TATA-box
Gohir.A07G202300.1	1304	1310	TATA-box
Gohir.A07G202300.1	1305	1311	TATA-box
Gohir.A07G202300.1	1312	1318	TATA-box
Gohir.A07G202300.1	1309	1313	TATA-box
Gohir.A07G202300.1	1327	1333	TATA-box
Gohir.A07G202300.1	1324	1328	TATA-box
Gohir.A07G202300.1	23	31	ERE
Gohir.A07G202300.1	150	158	ERE
Gohir.A07G202300.1	249	257	ERE
Gohir.A07G202300.1	590	598	ERE
Gohir.A07G202300.1	1229	1237	ERE
Gohir.A07G202300.1	0	6	ARE
Gohir.A07G202300.1	1046	1055	WUN-motif
Gohir.A07G202300.1	65	71	MYC
Gohir.A07G202300.1	317	323	MYC
Gohir.A07G202300.1	403	409	MYC
Gohir.A07G202300.1	793	799	MYC
Gohir.A07G202300.1	771	777	ABRE4
Gohir.A07G202300.1	693	699	GT1-motif
Gohir.A07G202300.1	706	712	GT1-motif
Gohir.A07G202300.1	1428	1434	GT1-motif
Gohir.A07G202300.1	1238	1246	chs-CMA1a
Gohir.A07G202300.1	765	771	ABRE3a
Gohir.A07G202300.1	780	786	G-Box
Gohir.A07G202300.1	146	153	GCN4_motif
Gohir.A07G202300.1	700	706	MYB
Gohir.A07G202300.1	1435	1441	MYB
Gohir.A07G202300.1	275	284	AAGAA-motif
Gohir.A07G202300.1	700	706	MYB-like sequence
Gohir.A07G202300.1	1435	1441	MYB-like sequence
Gohir.A07G202300.1	561	569	TATA
Gohir.A07G202300.1	675	683	TATA
Gohir.A07G202300.1	883	891	TATA
Gohir.A07G202300.1	989	997	TATA
Gohir.A08G192800.1	484	492	chs-CMA1a
Gohir.A08G192800.1	754	760	Sp1
Gohir.A08G192800.1	1406	1412	CAT-box
Gohir.A08G192800.1	612	618	MYB
Gohir.A08G192800.1	1119	1125	MYB
Gohir.A08G192800.1	1439	1445	MYB
Gohir.A08G192800.1	1458	1464	MYB
Gohir.A08G192800.1	1439	1445	MYB-like sequence
Gohir.A08G192800.1	1458	1464	MYB-like sequence
Gohir.A08G192800.1	58	63	CAAT-box
Gohir.A08G192800.1	147	151	CAAT-box
Gohir.A08G192800.1	306	311	CAAT-box
Gohir.A08G192800.1	337	342	CAAT-box
Gohir.A08G192800.1	349	354	CAAT-box
Gohir.A08G192800.1	456	461	CAAT-box
Gohir.A08G192800.1	472	476	CAAT-box
Gohir.A08G192800.1	479	484	CAAT-box
Gohir.A08G192800.1	546	551	CAAT-box
Gohir.A08G192800.1	595	600	CAAT-box
Gohir.A08G192800.1	632	636	CAAT-box
Gohir.A08G192800.1	684	689	CAAT-box
Gohir.A08G192800.1	847	852	CAAT-box
Gohir.A08G192800.1	883	887	CAAT-box
Gohir.A08G192800.1	894	898	CAAT-box
Gohir.A08G192800.1	916	921	CAAT-box
Gohir.A08G192800.1	925	929	CAAT-box
Gohir.A08G192800.1	942	946	CAAT-box
Gohir.A08G192800.1	1140	1145	CAAT-box
Gohir.A08G192800.1	1192	1197	CAAT-box
Gohir.A08G192800.1	1200	1204	CAAT-box
Gohir.A08G192800.1	1238	1243	CAAT-box
Gohir.A08G192800.1	1250	1255	CAAT-box
Gohir.A08G192800.1	1251	1255	CAAT-box
Gohir.A08G192800.1	1255	1260	CAAT-box
Gohir.A08G192800.1	1341	1345	CAAT-box
Gohir.A08G192800.1	1417	1421	CAAT-box
Gohir.A08G192800.1	82	91	TC-rich repeats
Gohir.A08G192800.1	761	767	TCT-motif
Gohir.A08G192800.1	719	725	W box
Gohir.A08G192800.1	92	97	CGTCA-motif
Gohir.A08G192800.1	1386	1391	CGTCA-motif
Gohir.A08G192800.1	77	85	TATA-box
Gohir.A08G192800.1	83	88	TATA-box
Gohir.A08G192800.1	89	93	TATA-box
Gohir.A08G192800.1	103	109	TATA-box
Gohir.A08G192800.1	105	110	TATA-box
Gohir.A08G192800.1	111	115	TATA-box
Gohir.A08G192800.1	202	208	TATA-box
Gohir.A08G192800.1	203	207	TATA-box
Gohir.A08G192800.1	274	283	TATA-box
Gohir.A08G192800.1	275	281	TATA-box
Gohir.A08G192800.1	276	280	TATA-box
Gohir.A08G192800.1	327	335	TATA-box
Gohir.A08G192800.1	332	338	TATA-box
Gohir.A08G192800.1	328	333	TATA-box
Gohir.A08G192800.1	334	338	TATA-box
Gohir.A08G192800.1	356	360	TATA-box
Gohir.A08G192800.1	365	374	TATA-box
Gohir.A08G192800.1	366	372	TATA-box
Gohir.A08G192800.1	367	371	TATA-box
Gohir.A08G192800.1	391	398	TATA-box
Gohir.A08G192800.1	393	399	TATA-box
Gohir.A08G192800.1	395	400	TATA-box
Gohir.A08G192800.1	401	405	TATA-box
Gohir.A08G192800.1	530	536	TATA-box
Gohir.A08G192800.1	531	535	TATA-box
Gohir.A08G192800.1	542	549	TATA-box
Gohir.A08G192800.1	590	594	TATA-box
Gohir.A08G192800.1	601	608	TATA-box
Gohir.A08G192800.1	893	899	TATA-box
Gohir.A08G192800.1	889	894	TATA-box
Gohir.A08G192800.1	891	895	TATA-box
Gohir.A08G192800.1	918	924	TATA-box
Gohir.A08G192800.1	922	926	TATA-box
Gohir.A08G192800.1	925	931	TATA-box
Gohir.A08G192800.1	929	933	TATA-box
Gohir.A08G192800.1	991	997	TATA-box
Gohir.A08G192800.1	985	992	TATA-box
Gohir.A08G192800.1	987	993	TATA-box
Gohir.A08G192800.1	988	994	TATA-box
Gohir.A08G192800.1	989	995	TATA-box
Gohir.A08G192800.1	990	996	TATA-box
Gohir.A08G192800.1	993	997	TATA-box
Gohir.A08G192800.1	999	1007	TATA-box
Gohir.A08G192800.1	1011	1017	TATA-box
Gohir.A08G192800.1	1008	1012	TATA-box
Gohir.A08G192800.1	1216	1222	TATA-box
Gohir.A08G192800.1	1213	1217	TATA-box
Gohir.A08G192800.1	1234	1242	TATA-box
Gohir.A08G192800.1	1353	1357	TATA-box
Gohir.A08G192800.1	385	391	ARE
Gohir.A08G192800.1	815	824	WUN-motif
Gohir.A08G192800.1	817	825	WUN-motif
Gohir.A08G192800.1	44	50	MYC
Gohir.A08G192800.1	290	296	MYC
Gohir.A08G192800.1	97	102	as-1
Gohir.A08G192800.1	1381	1386	as-1
Gohir.A08G192800.1	1446	1452	GT1-motif
Gohir.A08G192800.1	1451	1457	GT1-motif
Gohir.A08G192800.1	706	713	MRE
Gohir.A08G192800.1	1492	1498	MYB recognition site
Gohir.A08G192800.1	987	993	AT~TATA-box
Gohir.A08G192800.1	989	995	AT~TATA-box
Gohir.A08G192800.1	1486	1492	CCAAT-box
Gohir.A08G192800.1	204	210	MBS
Gohir.A08G192800.1	461	467	MBS
Gohir.A08G192800.1	149	155	Box 4
Gohir.A08G192800.1	1198	1204	Box 4
Gohir.A08G192800.1	3	10	P-box
Gohir.A08G192800.1	64	73	O2-site
Gohir.A08G192800.1	97	102	TGACG-motif
Gohir.A08G192800.1	1381	1386	TGACG-motif
Gohir.A08G192800.1	118	127	I-box
Gohir.A08G192800.1	731	741	I-box
Gohir.A08G192800.1	204	210	Myb
Gohir.A08G192800.1	461	467	Myb
Gohir.A08G192800.1	1359	1365	Myb
Gohir.A09G053900.2	873	879	Box 4
Gohir.A09G053900.2	1080	1086	Box 4
Gohir.A09G053900.2	1473	1479	Box 4
Gohir.A09G053900.2	1480	1486	Box 4
Gohir.A09G053900.2	613	619	G-box
Gohir.A09G053900.2	1432	1438	AT~TATA-box
Gohir.A09G053900.2	139	144	ABRE
Gohir.A09G053900.2	335	340	ABRE
Gohir.A09G053900.2	614	619	ABRE
Gohir.A09G053900.2	955	961	Myb
Gohir.A09G053900.2	241	246	STRE
Gohir.A09G053900.2	371	376	STRE
Gohir.A09G053900.2	593	598	STRE
Gohir.A09G053900.2	1137	1142	STRE
Gohir.A09G053900.2	806	813	P-box
Gohir.A09G053900.2	1000	1007	P-box
Gohir.A09G053900.2	1395	1403	TATA
Gohir.A09G053900.2	121	128	AAGAA-motif
Gohir.A09G053900.2	1209	1216	AAGAA-motif
Gohir.A09G053900.2	882	890	chs-CMA2a
Gohir.A09G053900.2	871	879	LAMP-element
Gohir.A09G053900.2	1078	1086	LAMP-element
Gohir.A09G053900.2	367	373	Myb-binding site
Gohir.A09G053900.2	627	633	Myb-binding site
Gohir.A09G053900.2	367	373	MYB
Gohir.A09G053900.2	627	633	MYB
Gohir.A09G053900.2	1022	1028	MYB
Gohir.A09G053900.2	144	150	G-Box
Gohir.A09G053900.2	340	346	G-Box
Gohir.A09G053900.2	613	619	ABRE3a
Gohir.A09G053900.2	1280	1286	GT1-motif
Gohir.A09G053900.2	607	613	ABRE4
Gohir.A09G053900.2	577	583	MYC
Gohir.A09G053900.2	1160	1166	MYC
Gohir.A09G053900.2	1297	1303	MYC
Gohir.A09G053900.2	1370	1376	MYC
Gohir.A09G053900.2	187	193	ARE
Gohir.A09G053900.2	246	252	ARE
Gohir.A09G053900.2	1166	1172	ARE
Gohir.A09G053900.2	1453	1460	AuxRR-core
Gohir.A09G053900.2	110	114	TATA-box
Gohir.A09G053900.2	848	854	TATA-box
Gohir.A09G053900.2	852	856	TATA-box
Gohir.A09G053900.2	860	866	TATA-box
Gohir.A09G053900.2	856	861	TATA-box
Gohir.A09G053900.2	858	862	TATA-box
Gohir.A09G053900.2	987	991	TATA-box
Gohir.A09G053900.2	1130	1136	TATA-box
Gohir.A09G053900.2	1127	1131	TATA-box
Gohir.A09G053900.2	1383	1391	TATA-box
Gohir.A09G053900.2	1389	1394	TATA-box
Gohir.A09G053900.2	1391	1395	TATA-box
Gohir.A09G053900.2	1432	1438	TATA-box
Gohir.A09G053900.2	1433	1439	TATA-box
Gohir.A09G053900.2	1436	1440	TATA-box
Gohir.A09G053900.2	1043	1049	W box
Gohir.A09G053900.2	123	127	CAAT-box
Gohir.A09G053900.2	214	219	CAAT-box
Gohir.A09G053900.2	215	219	CAAT-box
Gohir.A09G053900.2	315	320	CAAT-box
Gohir.A09G053900.2	316	320	CAAT-box
Gohir.A09G053900.2	467	471	CAAT-box
Gohir.A09G053900.2	577	581	CAAT-box
Gohir.A09G053900.2	575	579	CAAT-box
Gohir.A09G053900.2	681	685	CAAT-box
Gohir.A09G053900.2	686	691	CAAT-box
Gohir.A09G053900.2	701	705	CAAT-box
Gohir.A09G053900.2	713	717	CAAT-box
Gohir.A09G053900.2	820	824	CAAT-box
Gohir.A09G053900.2	877	881	CAAT-box
Gohir.A09G053900.2	1052	1056	CAAT-box
Gohir.A09G053900.2	1084	1088	CAAT-box
Gohir.A09G053900.2	1097	1102	CAAT-box
Gohir.A09G053900.2	1096	1100	CAAT-box
Gohir.A09G053900.2	1127	1132	CAAT-box
Gohir.A09G053900.2	1156	1161	CAAT-box
Gohir.A09G053900.2	1201	1205	CAAT-box
Gohir.A09G053900.2	1244	1249	CAAT-box
Gohir.A09G053900.2	1266	1270	CAAT-box
Gohir.A09G053900.2	1302	1307	CAAT-box
Gohir.A09G053900.2	1303	1307	CAAT-box
Gohir.A09G053900.2	1301	1305	CAAT-box
Gohir.A09G053900.2	1313	1317	CAAT-box
Gohir.A09G053900.2	1366	1371	CAAT-box
Gohir.A09G053900.2	1454	1458	CAAT-box
Gohir.A09G053900.2	1465	1469	CAAT-box
Gohir.A12G152100.2	567	573	MYB
Gohir.A12G152100.2	21	27	AT~TATA-box
Gohir.A12G152100.2	117	123	AT~TATA-box
Gohir.A12G152100.2	1045	1051	AT~TATA-box
Gohir.A12G152100.2	1129	1137	TATA
Gohir.A12G152100.2	1146	1154	TATA
Gohir.A12G152100.2	1187	1193	Box 4
Gohir.A12G152100.2	1286	1292	Box 4
Gohir.A12G152100.2	155	161	G-box
Gohir.A12G152100.2	350	363	AT1-motif
Gohir.A12G152100.2	69	73	CAAT-box
Gohir.A12G152100.2	139	144	CAAT-box
Gohir.A12G152100.2	208	213	CAAT-box
Gohir.A12G152100.2	283	287	CAAT-box
Gohir.A12G152100.2	306	311	CAAT-box
Gohir.A12G152100.2	322	327	CAAT-box
Gohir.A12G152100.2	327	335	CAAT-box
Gohir.A12G152100.2	328	333	CAAT-box
Gohir.A12G152100.2	329	333	CAAT-box
Gohir.A12G152100.2	349	353	CAAT-box
Gohir.A12G152100.2	397	402	CAAT-box
Gohir.A12G152100.2	404	409	CAAT-box
Gohir.A12G152100.2	405	409	CAAT-box
Gohir.A12G152100.2	518	523	CAAT-box
Gohir.A12G152100.2	532	537	CAAT-box
Gohir.A12G152100.2	636	640	CAAT-box
Gohir.A12G152100.2	663	668	CAAT-box
Gohir.A12G152100.2	662	666	CAAT-box
Gohir.A12G152100.2	714	718	CAAT-box
Gohir.A12G152100.2	712	716	CAAT-box
Gohir.A12G152100.2	832	836	CAAT-box
Gohir.A12G152100.2	849	854	CAAT-box
Gohir.A12G152100.2	941	945	CAAT-box
Gohir.A12G152100.2	987	992	CAAT-box
Gohir.A12G152100.2	1069	1073	CAAT-box
Gohir.A12G152100.2	1086	1090	CAAT-box
Gohir.A12G152100.2	1131	1135	CAAT-box
Gohir.A12G152100.2	1195	1200	CAAT-box
Gohir.A12G152100.2	1232	1236	CAAT-box
Gohir.A12G152100.2	1251	1255	CAAT-box
Gohir.A12G152100.2	1398	1403	CAAT-box
Gohir.A12G152100.2	1406	1411	CAAT-box
Gohir.A12G152100.2	1454	1458	CAAT-box
Gohir.A12G152100.2	1489	1494	CAAT-box
Gohir.A12G152100.2	564	569	CGTCA-motif
Gohir.A12G152100.2	559	564	TGACG-motif
Gohir.A12G152100.2	1421	1430	I-box
Gohir.A12G152100.2	423	428	STRE
Gohir.A12G152100.2	619	624	STRE
Gohir.A12G152100.2	714	720	MYC
Gohir.A12G152100.2	1410	1416	MYC
Gohir.A12G152100.2	559	564	as-1
Gohir.A12G152100.2	19	25	TATA-box
Gohir.A12G152100.2	13	20	TATA-box
Gohir.A12G152100.2	21	27	TATA-box
Gohir.A12G152100.2	22	28	TATA-box
Gohir.A12G152100.2	23	27	TATA-box
Gohir.A12G152100.2	34	38	TATA-box
Gohir.A12G152100.2	115	121	TATA-box
Gohir.A12G152100.2	109	116	TATA-box
Gohir.A12G152100.2	117	123	TATA-box
Gohir.A12G152100.2	118	124	TATA-box
Gohir.A12G152100.2	119	123	TATA-box
Gohir.A12G152100.2	142	148	TATA-box
Gohir.A12G152100.2	138	143	TATA-box
Gohir.A12G152100.2	144	148	TATA-box
Gohir.A12G152100.2	192	200	TATA-box
Gohir.A12G152100.2	194	201	TATA-box
Gohir.A12G152100.2	196	202	TATA-box
Gohir.A12G152100.2	198	203	TATA-box
Gohir.A12G152100.2	204	208	TATA-box
Gohir.A12G152100.2	230	234	TATA-box
Gohir.A12G152100.2	252	261	TATA-box
Gohir.A12G152100.2	255	263	TATA-box
Gohir.A12G152100.2	695	699	TATA-box
Gohir.A12G152100.2	755	761	TATA-box
Gohir.A12G152100.2	757	762	TATA-box
Gohir.A12G152100.2	759	763	TATA-box
Gohir.A12G152100.2	990	996	TATA-box
Gohir.A12G152100.2	986	991	TATA-box
Gohir.A12G152100.2	988	992	TATA-box
Gohir.A12G152100.2	1044	1050	TATA-box
Gohir.A12G152100.2	1045	1051	TATA-box
Gohir.A12G152100.2	1052	1058	TATA-box
Gohir.A12G152100.2	1049	1053	TATA-box
Gohir.A12G152100.2	1062	1070	TATA-box
Gohir.A12G152100.2	1079	1085	TATA-box
Gohir.A12G152100.2	1075	1080	TATA-box
Gohir.A12G152100.2	1077	1081	TATA-box
Gohir.A12G152100.2	1128	1134	TATA-box
Gohir.A12G152100.2	1125	1129	TATA-box
Gohir.A12G152100.2	1148	1155	TATA-box
Gohir.A12G152100.2	1150	1156	TATA-box
Gohir.A12G152100.2	1152	1157	TATA-box
Gohir.A12G152100.2	1154	1158	TATA-box
Gohir.A12G152100.2	1158	1165	TATA-box
Gohir.A12G152100.2	1160	1166	TATA-box
Gohir.A12G152100.2	1162	1167	TATA-box
Gohir.A12G152100.2	1164	1168	TATA-box
Gohir.A12G152100.2	760	769	TCA-element
Gohir.A12G152100.2	1088	1096	ERE
Gohir.A12G152100.2	443	449	Myb
Gohir.A12G152100.2	640	646	Myb
Gohir.D01G140100.1	360	366	Myb-binding site
Gohir.D01G140100.1	273	279	MYB
Gohir.D01G140100.1	360	366	MYB
Gohir.D01G140100.1	435	441	MYB
Gohir.D01G140100.1	1083	1089	MYB
Gohir.D01G140100.1	435	441	MYB-like sequence
Gohir.D01G140100.1	1083	1089	MYB-like sequence
Gohir.D01G140100.1	500	509	AAGAA-motif
Gohir.D01G140100.1	135	143	LAMP-element
Gohir.D01G140100.1	1059	1065	TCT-motif
Gohir.D01G140100.1	624	630	W box
Gohir.D01G140100.1	1428	1433	CGTCA-motif
Gohir.D01G140100.1	18	23	CAAT-box
Gohir.D01G140100.1	48	53	CAAT-box
Gohir.D01G140100.1	259	264	CAAT-box
Gohir.D01G140100.1	295	300	CAAT-box
Gohir.D01G140100.1	351	355	CAAT-box
Gohir.D01G140100.1	397	402	CAAT-box
Gohir.D01G140100.1	475	479	CAAT-box
Gohir.D01G140100.1	485	489	CAAT-box
Gohir.D01G140100.1	595	600	CAAT-box
Gohir.D01G140100.1	609	613	CAAT-box
Gohir.D01G140100.1	633	638	CAAT-box
Gohir.D01G140100.1	645	649	CAAT-box
Gohir.D01G140100.1	670	675	CAAT-box
Gohir.D01G140100.1	918	922	CAAT-box
Gohir.D01G140100.1	925	929	CAAT-box
Gohir.D01G140100.1	1095	1099	CAAT-box
Gohir.D01G140100.1	1115	1119	CAAT-box
Gohir.D01G140100.1	1127	1132	CAAT-box
Gohir.D01G140100.1	1128	1132	CAAT-box
Gohir.D01G140100.1	1126	1130	CAAT-box
Gohir.D01G140100.1	1250	1254	CAAT-box
Gohir.D01G140100.1	1325	1330	CAAT-box
Gohir.D01G140100.1	1326	1330	CAAT-box
Gohir.D01G140100.1	1401	1406	CAAT-box
Gohir.D01G140100.1	1475	1479	CAAT-box
Gohir.D01G140100.1	1480	1485	CAAT-box
Gohir.D01G140100.1	1008	1014	GT1-motif
Gohir.D01G140100.1	1203	1211	ERE
Gohir.D01G140100.1	1308	1316	ERE
Gohir.D01G140100.1	1347	1353	TGA-element
Gohir.D01G140100.1	1468	1474	TGA-element
Gohir.D01G140100.1	14	19	TATA-box
Gohir.D01G140100.1	20	24	TATA-box
Gohir.D01G140100.1	220	228	TATA-box
Gohir.D01G140100.1	387	391	TATA-box
Gohir.D01G140100.1	539	545	TATA-box
Gohir.D01G140100.1	540	546	TATA-box
Gohir.D01G140100.1	541	547	TATA-box
Gohir.D01G140100.1	542	548	TATA-box
Gohir.D01G140100.1	543	547	TATA-box
Gohir.D01G140100.1	655	659	TATA-box
Gohir.D01G140100.1	940	944	TATA-box
Gohir.D01G140100.1	1384	1390	TATA-box
Gohir.D01G140100.1	1387	1391	TATA-box
Gohir.D01G140100.1	1412	1420	TATA-box
Gohir.D01G140100.1	1423	1428	as-1
Gohir.D01G140100.1	23	29	ARE
Gohir.D01G140100.1	277	283	ARE
Gohir.D01G140100.1	263	269	MYC
Gohir.D01G140100.1	1122	1128	MYC
Gohir.D01G140100.1	1187	1196	ATCT-motif
Gohir.D01G140100.1	741	749	RY-element
Gohir.D01G140100.1	469	475	Box 4
Gohir.D01G140100.1	539	545	AT~TATA-box
Gohir.D01G140100.1	541	547	AT~TATA-box
Gohir.D01G140100.1	393	398	STRE
Gohir.D01G140100.1	1423	1428	TGACG-motif
Gohir.D01G140100.1	119	125	WRE3
Gohir.D04G186000.1	198	204	Box 4
Gohir.D04G186000.1	398	404	Box 4
Gohir.D04G186000.1	11	17	AT~TATA-box
Gohir.D04G186000.1	417	423	AT~TATA-box
Gohir.D04G186000.1	1250	1255	TGACG-motif
Gohir.D04G186000.1	974	984	F-box
Gohir.D04G186000.1	798	807	CTAG-motif
Gohir.D04G186000.1	1010	1016	LTR
Gohir.D04G186000.1	309	315	Myb-binding site
Gohir.D04G186000.1	309	315	MYB
Gohir.D04G186000.1	414	422	TATA
Gohir.D04G186000.1	726	734	TATA
Gohir.D04G186000.1	456	463	AAGAA-motif
Gohir.D04G186000.1	578	589	Box III
Gohir.D04G186000.1	1255	1260	CGTCA-motif
Gohir.D04G186000.1	332	338	TCT-motif
Gohir.D04G186000.1	58	62	CAAT-box
Gohir.D04G186000.1	140	144	CAAT-box
Gohir.D04G186000.1	151	155	CAAT-box
Gohir.D04G186000.1	201	205	CAAT-box
Gohir.D04G186000.1	287	292	CAAT-box
Gohir.D04G186000.1	329	333	CAAT-box
Gohir.D04G186000.1	397	402	CAAT-box
Gohir.D04G186000.1	469	474	CAAT-box
Gohir.D04G186000.1	528	533	CAAT-box
Gohir.D04G186000.1	550	555	CAAT-box
Gohir.D04G186000.1	615	620	CAAT-box
Gohir.D04G186000.1	649	653	CAAT-box
Gohir.D04G186000.1	856	860	CAAT-box
Gohir.D04G186000.1	915	919	CAAT-box
Gohir.D04G186000.1	925	929	CAAT-box
Gohir.D04G186000.1	949	954	CAAT-box
Gohir.D04G186000.1	1050	1055	CAAT-box
Gohir.D04G186000.1	1061	1066	CAAT-box
Gohir.D04G186000.1	1108	1113	CAAT-box
Gohir.D04G186000.1	1130	1135	CAAT-box
Gohir.D04G186000.1	1147	1151	CAAT-box
Gohir.D04G186000.1	1178	1182	CAAT-box
Gohir.D04G186000.1	1209	1213	CAAT-box
Gohir.D04G186000.1	1226	1230	CAAT-box
Gohir.D04G186000.1	1259	1263	CAAT-box
Gohir.D04G186000.1	1281	1285	CAAT-box
Gohir.D04G186000.1	1309	1314	CAAT-box
Gohir.D04G186000.1	1338	1343	CAAT-box
Gohir.D04G186000.1	1435	1440	CAAT-box
Gohir.D04G186000.1	1463	1467	CAAT-box
Gohir.D04G186000.1	473	480	MRE
Gohir.D04G186000.1	1157	1164	GT1-motif
Gohir.D04G186000.1	1250	1255	as-1
Gohir.D04G186000.1	1063	1069	ARE
Gohir.D04G186000.1	681	690	WUN-motif
Gohir.D04G186000.1	683	691	WUN-motif
Gohir.D04G186000.1	1370	1378	WUN-motif
Gohir.D04G186000.1	619	625	MYC
Gohir.D04G186000.1	175	183	ERE
Gohir.D04G186000.1	216	224	ERE
Gohir.D04G186000.1	210	218	ERE
Gohir.D04G186000.1	224	232	ERE
Gohir.D04G186000.1	253	261	ERE
Gohir.D04G186000.1	739	747	ERE
Gohir.D04G186000.1	816	824	ERE
Gohir.D04G186000.1	974	982	ERE
Gohir.D04G186000.1	1228	1236	ERE
Gohir.D04G186000.1	1476	1484	ERE
Gohir.D04G186000.1	925	934	TCA-element
Gohir.D04G186000.1	11	17	TATA-box
Gohir.D04G186000.1	13	17	TATA-box
Gohir.D04G186000.1	24	33	TATA-box
Gohir.D04G186000.1	20	25	TATA-box
Gohir.D04G186000.1	26	30	TATA-box
Gohir.D04G186000.1	220	232	TATA-box
Gohir.D04G186000.1	240	246	TATA-box
Gohir.D04G186000.1	241	245	TATA-box
Gohir.D04G186000.1	279	285	TATA-box
Gohir.D04G186000.1	280	284	TATA-box
Gohir.D04G186000.1	358	367	TATA-box
Gohir.D04G186000.1	361	368	TATA-box
Gohir.D04G186000.1	363	369	TATA-box
Gohir.D04G186000.1	365	370	TATA-box
Gohir.D04G186000.1	371	375	TATA-box
Gohir.D04G186000.1	416	422	TATA-box
Gohir.D04G186000.1	417	423	TATA-box
Gohir.D04G186000.1	418	424	TATA-box
Gohir.D04G186000.1	419	423	TATA-box
Gohir.D04G186000.1	416	423	TATA-box
Gohir.D04G186000.1	418	424	TATA-box
Gohir.D04G186000.1	420	425	TATA-box
Gohir.D04G186000.1	426	430	TATA-box
Gohir.D04G186000.1	542	546	TATA-box
Gohir.D04G186000.1	605	609	TATA-box
Gohir.D04G186000.1	714	720	TATA-box
Gohir.D04G186000.1	710	715	TATA-box
Gohir.D04G186000.1	716	720	TATA-box
Gohir.D04G186000.1	724	730	TATA-box
Gohir.D04G186000.1	720	725	TATA-box
Gohir.D04G186000.1	726	730	TATA-box
Gohir.D04G186000.1	745	753	TATA-box
Gohir.D04G186000.1	782	789	TATA-box
Gohir.D04G186000.1	874	878	TATA-box
Gohir.D04G186000.1	912	918	TATA-box
Gohir.D04G186000.1	908	913	TATA-box
Gohir.D04G186000.1	910	914	TATA-box
Gohir.D04G186000.1	930	937	TATA-box
Gohir.D04G186000.1	1034	1038	TATA-box
Gohir.D04G186000.1	1133	1139	TATA-box
Gohir.D04G186000.1	1129	1134	TATA-box
Gohir.D04G186000.1	1131	1135	TATA-box
Gohir.D04G186000.1	1186	1192	TATA-box
Gohir.D04G186000.1	1183	1187	TATA-box
Gohir.D04G186000.1	1186	1192	TATA-box
Gohir.D04G186000.1	1190	1194	TATA-box
Gohir.D04G186000.1	1290	1297	TATA-box
Gohir.D05G309600.1	429	437	chs-CMA1a
Gohir.D05G309600.1	890	896	Sp1
Gohir.D05G309600.1	679	688	AT-rich sequence
Gohir.D05G309600.1	1095	1104	AT-rich sequence
Gohir.D05G309600.1	780	788	TATA
Gohir.D05G309600.1	320	327	AAGAA-motif
Gohir.D05G309600.1	970	979	AAGAA-motif
Gohir.D05G309600.1	13	19	TCT-motif
Gohir.D05G309600.1	611	617	TCT-motif
Gohir.D05G309600.1	903	908	CGTCA-motif
Gohir.D05G309600.1	45	49	CAAT-box
Gohir.D05G309600.1	152	157	CAAT-box
Gohir.D05G309600.1	153	157	CAAT-box
Gohir.D05G309600.1	230	234	CAAT-box
Gohir.D05G309600.1	237	241	CAAT-box
Gohir.D05G309600.1	256	260	CAAT-box
Gohir.D05G309600.1	301	305	CAAT-box
Gohir.D05G309600.1	333	338	CAAT-box
Gohir.D05G309600.1	334	338	CAAT-box
Gohir.D05G309600.1	331	336	CAAT-box
Gohir.D05G309600.1	383	387	CAAT-box
Gohir.D05G309600.1	540	544	CAAT-box
Gohir.D05G309600.1	730	735	CAAT-box
Gohir.D05G309600.1	755	759	CAAT-box
Gohir.D05G309600.1	778	782	CAAT-box
Gohir.D05G309600.1	1056	1060	CAAT-box
Gohir.D05G309600.1	1140	1148	CAAT-box
Gohir.D05G309600.1	1145	1150	CAAT-box
Gohir.D05G309600.1	1275	1280	CAAT-box
Gohir.D05G309600.1	1368	1372	CAAT-box
Gohir.D05G309600.1	1422	1426	CAAT-box
Gohir.D05G309600.1	1481	1485	CAAT-box
Gohir.D05G309600.1	962	971	TC-rich repeats
Gohir.D05G309600.1	209	217	ERE
Gohir.D05G309600.1	296	304	ERE
Gohir.D05G309600.1	418	426	ERE
Gohir.D05G309600.1	507	515	ERE
Gohir.D05G309600.1	592	600	ERE
Gohir.D05G309600.1	657	665	ERE
Gohir.D05G309600.1	675	683	ERE
Gohir.D05G309600.1	669	677	ERE
Gohir.D05G309600.1	1091	1099	ERE
Gohir.D05G309600.1	1085	1093	ERE
Gohir.D05G309600.1	1113	1121	ERE
Gohir.D05G309600.1	1401	1409	ERE
Gohir.D05G309600.1	293	303	AT-rich element
Gohir.D05G309600.1	29	34	TATA-box
Gohir.D05G309600.1	35	39	TATA-box
Gohir.D05G309600.1	125	132	TATA-box
Gohir.D05G309600.1	127	133	TATA-box
Gohir.D05G309600.1	129	134	TATA-box
Gohir.D05G309600.1	135	139	TATA-box
Gohir.D05G309600.1	158	166	TATA-box
Gohir.D05G309600.1	258	264	TATA-box
Gohir.D05G309600.1	259	263	TATA-box
Gohir.D05G309600.1	274	280	TATA-box
Gohir.D05G309600.1	282	286	TATA-box
Gohir.D05G309600.1	406	412	TATA-box
Gohir.D05G309600.1	408	413	TATA-box
Gohir.D05G309600.1	414	418	TATA-box
Gohir.D05G309600.1	487	493	TATA-box
Gohir.D05G309600.1	495	499	TATA-box
Gohir.D05G309600.1	560	564	TATA-box
Gohir.D05G309600.1	582	588	TATA-box
Gohir.D05G309600.1	583	587	TATA-box
Gohir.D05G309600.1	598	606	TATA-box
Gohir.D05G309600.1	782	789	TATA-box
Gohir.D05G309600.1	784	790	TATA-box
Gohir.D05G309600.1	786	791	TATA-box
Gohir.D05G309600.1	788	792	TATA-box
Gohir.D05G309600.1	807	813	TATA-box
Gohir.D05G309600.1	803	808	TATA-box
Gohir.D05G309600.1	805	809	TATA-box
Gohir.D05G309600.1	843	849	TATA-box
Gohir.D05G309600.1	840	844	TATA-box
Gohir.D05G309600.1	946	952	TATA-box
Gohir.D05G309600.1	943	947	TATA-box
Gohir.D05G309600.1	1056	1062	TATA-box
Gohir.D05G309600.1	1057	1063	TATA-box
Gohir.D05G309600.1	1058	1064	TATA-box
Gohir.D05G309600.1	1059	1065	TATA-box
Gohir.D05G309600.1	1060	1066	TATA-box
Gohir.D05G309600.1	1063	1067	TATA-box
Gohir.D05G309600.1	1287	1292	TATA-box
Gohir.D05G309600.1	1289	1293	TATA-box
Gohir.D05G309600.1	1305	1310	TATA-box
Gohir.D05G309600.1	1307	1311	TATA-box
Gohir.D05G309600.1	1484	1491	TATA-box
Gohir.D05G309600.1	908	913	as-1
Gohir.D05G309600.1	119	128	WUN-motif
Gohir.D05G309600.1	432	440	WUN-motif
Gohir.D05G309600.1	334	340	MYC
Gohir.D05G309600.1	734	740	MYC
Gohir.D05G309600.1	332	338	ARE
Gohir.D05G309600.1	1385	1391	Box 4
Gohir.D05G309600.1	1449	1455	Box 4
Gohir.D05G309600.1	1057	1063	AT~TATA-box
Gohir.D05G309600.1	1059	1065	AT~TATA-box
Gohir.D05G309600.1	1236	1243	ABRE
Gohir.D05G309600.1	908	913	TGACG-motif
Gohir.D05G309600.1	564	571	P-box
Gohir.D05G309600.1	78	87	O2-site
Gohir.D05G309600.1	954	960	LTR
Gohir.D07G160200.1	278	284	AT~TATA-box
Gohir.D07G160200.1	698	704	AT~TATA-box
Gohir.D07G160200.1	809	815	AT~TATA-box
Gohir.D07G160200.1	811	817	AT~TATA-box
Gohir.D07G160200.1	813	819	AT~TATA-box
Gohir.D07G160200.1	316	321	ABRE
Gohir.D07G160200.1	657	662	ABRE
Gohir.D07G160200.1	570	576	CCAAT-box
Gohir.D07G160200.1	384	393	GATA-motif
Gohir.D07G160200.1	871	878	GARE-motif
Gohir.D07G160200.1	891	897	Box 4
Gohir.D07G160200.1	1300	1306	Box 4
Gohir.D07G160200.1	510	516	G-box
Gohir.D07G160200.1	1078	1084	MBS
Gohir.D07G160200.1	564	570	MYB recognition site
Gohir.D07G160200.1	1078	1084	Myb
Gohir.D07G160200.1	472	478	WRE3
Gohir.D07G160200.1	1159	1166	P-box
Gohir.D07G160200.1	38	43	STRE
Gohir.D07G160200.1	426	431	STRE
Gohir.D07G160200.1	376	385	I-box
Gohir.D07G160200.1	386	395	I-box
Gohir.D07G160200.1	550	558	CARE
Gohir.D07G160200.1	1218	1223	TGACG-motif
Gohir.D07G160200.1	1287	1294	AAGAA-motif
Gohir.D07G160200.1	1314	1321	AAGAA-motif
Gohir.D07G160200.1	1338	1347	AAGAA-motif
Gohir.D07G160200.1	1383	1390	AAGAA-motif
Gohir.D07G160200.1	321	327	G-Box
Gohir.D07G160200.1	650	656	G-Box
Gohir.D07G160200.1	866	872	Myb-binding site
Gohir.D07G160200.1	866	872	MYB
Gohir.D07G160200.1	1454	1460	MYB
Gohir.D07G160200.1	375	381	TGA-element
Gohir.D07G160200.1	156	164	ERE
Gohir.D07G160200.1	180	188	ERE
Gohir.D07G160200.1	908	916	ERE
Gohir.D07G160200.1	902	910	ERE
Gohir.D07G160200.1	996	1004	ERE
Gohir.D07G160200.1	71	77	TATA-box
Gohir.D07G160200.1	67	72	TATA-box
Gohir.D07G160200.1	73	77	TATA-box
Gohir.D07G160200.1	170	176	TATA-box
Gohir.D07G160200.1	171	175	TATA-box
Gohir.D07G160200.1	277	283	TATA-box
Gohir.D07G160200.1	278	284	TATA-box
Gohir.D07G160200.1	279	285	TATA-box
Gohir.D07G160200.1	280	284	TATA-box
Gohir.D07G160200.1	421	427	TATA-box
Gohir.D07G160200.1	417	422	TATA-box
Gohir.D07G160200.1	423	427	TATA-box
Gohir.D07G160200.1	697	703	TATA-box
Gohir.D07G160200.1	698	704	TATA-box
Gohir.D07G160200.1	699	705	TATA-box
Gohir.D07G160200.1	700	704	TATA-box
Gohir.D07G160200.1	725	729	TATA-box
Gohir.D07G160200.1	738	745	TATA-box
Gohir.D07G160200.1	748	754	TATA-box
Gohir.D07G160200.1	751	755	TATA-box
Gohir.D07G160200.1	813	819	TATA-box
Gohir.D07G160200.1	807	814	TATA-box
Gohir.D07G160200.1	809	815	TATA-box
Gohir.D07G160200.1	810	816	TATA-box
Gohir.D07G160200.1	811	817	TATA-box
Gohir.D07G160200.1	812	818	TATA-box
Gohir.D07G160200.1	813	819	TATA-box
Gohir.D07G160200.1	814	820	TATA-box
Gohir.D07G160200.1	817	821	TATA-box
Gohir.D07G160200.1	1164	1171	TATA-box
Gohir.D07G160200.1	1218	1223	as-1
Gohir.D07G160200.1	451	457	MYC
Gohir.D07G160200.1	1001	1007	ARE
Gohir.D07G160200.1	736	745	WUN-motif
Gohir.D07G160200.1	924	933	WUN-motif
Gohir.D07G160200.1	932	941	WUN-motif
Gohir.D07G160200.1	1447	1455	WUN-motif
Gohir.D07G160200.1	51	55	CAAT-box
Gohir.D07G160200.1	69	73	CAAT-box
Gohir.D07G160200.1	104	109	CAAT-box
Gohir.D07G160200.1	127	131	CAAT-box
Gohir.D07G160200.1	198	203	CAAT-box
Gohir.D07G160200.1	238	243	CAAT-box
Gohir.D07G160200.1	274	279	CAAT-box
Gohir.D07G160200.1	275	279	CAAT-box
Gohir.D07G160200.1	334	338	CAAT-box
Gohir.D07G160200.1	368	372	CAAT-box
Gohir.D07G160200.1	447	451	CAAT-box
Gohir.D07G160200.1	451	455	CAAT-box
Gohir.D07G160200.1	449	453	CAAT-box
Gohir.D07G160200.1	478	482	CAAT-box
Gohir.D07G160200.1	518	522	CAAT-box
Gohir.D07G160200.1	572	576	CAAT-box
Gohir.D07G160200.1	618	622	CAAT-box
Gohir.D07G160200.1	623	627	CAAT-box
Gohir.D07G160200.1	625	629	CAAT-box
Gohir.D07G160200.1	636	640	CAAT-box
Gohir.D07G160200.1	735	740	CAAT-box
Gohir.D07G160200.1	773	778	CAAT-box
Gohir.D07G160200.1	793	798	CAAT-box
Gohir.D07G160200.1	858	862	CAAT-box
Gohir.D07G160200.1	1031	1036	CAAT-box
Gohir.D07G160200.1	1226	1230	CAAT-box
Gohir.D07G160200.1	1355	1360	CAAT-box
Gohir.D07G160200.1	1356	1360	CAAT-box
Gohir.D07G160200.1	1362	1366	CAAT-box
Gohir.D07G160200.1	1379	1383	CAAT-box
Gohir.D07G160200.1	1419	1423	CAAT-box
Gohir.D07G160200.1	1429	1433	CAAT-box
Gohir.D07G160200.1	1446	1451	CAAT-box
Gohir.D07G160200.1	1445	1455	CAAT-box
Gohir.D07G160200.1	1453	1458	CAAT-box
Gohir.D07G160200.1	901	915	AT1-motif
Gohir.D07G160200.1	1223	1228	CGTCA-motif
Gohir.D07G160200.1	726	732	W box
Gohir.D07G160250.1	1127	1133	LTR
Gohir.D07G160250.1	580	586	Myb
Gohir.D07G160250.1	625	631	Myb
Gohir.D07G160250.1	990	997	P-box
Gohir.D07G160250.1	851	856	TGACG-motif
Gohir.D07G160250.1	919	924	STRE
Gohir.D07G160250.1	580	586	MBS
Gohir.D07G160250.1	625	631	MBS
Gohir.D07G160250.1	851	856	as-1
Gohir.D07G160250.1	334	340	MYC
Gohir.D07G160250.1	1491	1497	MYC
Gohir.D07G160250.1	693	699	ARE
Gohir.D07G160250.1	1427	1434	AuxRR-core
Gohir.D07G160250.1	15	19	TATA-box
Gohir.D07G160250.1	564	568	TATA-box
Gohir.D07G160250.1	681	687	TATA-box
Gohir.D07G160250.1	683	688	TATA-box
Gohir.D07G160250.1	689	693	TATA-box
Gohir.D07G160250.1	729	733	TATA-box
Gohir.D07G160250.1	955	963	TATA-box
Gohir.D07G160250.1	1242	1247	TATA-box
Gohir.D07G160250.1	1244	1248	TATA-box
Gohir.D07G160250.1	1473	1479	TATA-box
Gohir.D07G160250.1	1469	1474	TATA-box
Gohir.D07G160250.1	1471	1475	TATA-box
Gohir.D07G160250.1	1475	1481	TATA-box
Gohir.D07G160250.1	1479	1483	TATA-box
Gohir.D07G160250.1	273	280	MRE
Gohir.D07G160250.1	1180	1187	GT1-motif
Gohir.D07G160250.1	23	27	CAAT-box
Gohir.D07G160250.1	84	89	CAAT-box
Gohir.D07G160250.1	85	89	CAAT-box
Gohir.D07G160250.1	128	132	CAAT-box
Gohir.D07G160250.1	159	163	CAAT-box
Gohir.D07G160250.1	224	229	CAAT-box
Gohir.D07G160250.1	302	306	CAAT-box
Gohir.D07G160250.1	321	326	CAAT-box
Gohir.D07G160250.1	334	338	CAAT-box
Gohir.D07G160250.1	332	336	CAAT-box
Gohir.D07G160250.1	466	470	CAAT-box
Gohir.D07G160250.1	500	504	CAAT-box
Gohir.D07G160250.1	647	651	CAAT-box
Gohir.D07G160250.1	698	702	CAAT-box
Gohir.D07G160250.1	711	715	CAAT-box
Gohir.D07G160250.1	761	765	CAAT-box
Gohir.D07G160250.1	874	879	CAAT-box
Gohir.D07G160250.1	935	940	CAAT-box
Gohir.D07G160250.1	1039	1043	CAAT-box
Gohir.D07G160250.1	1181	1185	CAAT-box
Gohir.D07G160250.1	1221	1226	CAAT-box
Gohir.D07G160250.1	1229	1233	CAAT-box
Gohir.D07G160250.1	1322	1326	CAAT-box
Gohir.D07G160250.1	1381	1386	CAAT-box
Gohir.D07G160250.1	1411	1415	CAAT-box
Gohir.D07G160250.1	1487	1492	CAAT-box
Gohir.D07G160250.1	382	388	W box
Gohir.D07G160250.1	856	861	CGTCA-motif
Gohir.D07G160250.1	1159	1165	TCT-motif
Gohir.D07G160250.1	494	500	MYB-like sequence
Gohir.D07G160250.1	848	854	MYB-like sequence
Gohir.D07G160250.1	1034	1043	AAGAA-motif
Gohir.D07G160250.1	810	816	Sp1
Gohir.D07G160250.1	336	342	CAT-box
Gohir.D07G160250.1	785	791	CAT-box
Gohir.D07G160250.1	250	258	chs-CMA1a
Gohir.D07G160250.1	472	478	Myb-binding site
Gohir.D07G160250.1	472	478	MYB
Gohir.D07G160250.1	494	500	MYB
Gohir.D07G160250.1	848	854	MYB
Gohir.D07G208500.1	1201	1210	TC-rich repeats
Gohir.D07G208500.1	340	353	AT1-motif
Gohir.D07G208500.1	4	8	CAAT-box
Gohir.D07G208500.1	81	86	CAAT-box
Gohir.D07G208500.1	154	159	CAAT-box
Gohir.D07G208500.1	186	190	CAAT-box
Gohir.D07G208500.1	283	287	CAAT-box
Gohir.D07G208500.1	308	313	CAAT-box
Gohir.D07G208500.1	306	311	CAAT-box
Gohir.D07G208500.1	392	396	CAAT-box
Gohir.D07G208500.1	390	394	CAAT-box
Gohir.D07G208500.1	396	401	CAAT-box
Gohir.D07G208500.1	434	439	CAAT-box
Gohir.D07G208500.1	453	457	CAAT-box
Gohir.D07G208500.1	483	487	CAAT-box
Gohir.D07G208500.1	481	485	CAAT-box
Gohir.D07G208500.1	505	510	CAAT-box
Gohir.D07G208500.1	692	697	CAAT-box
Gohir.D07G208500.1	733	737	CAAT-box
Gohir.D07G208500.1	865	869	CAAT-box
Gohir.D07G208500.1	969	974	CAAT-box
Gohir.D07G208500.1	988	992	CAAT-box
Gohir.D07G208500.1	1032	1036	CAAT-box
Gohir.D07G208500.1	1040	1044	CAAT-box
Gohir.D07G208500.1	1144	1148	CAAT-box
Gohir.D07G208500.1	1154	1158	CAAT-box
Gohir.D07G208500.1	1372	1376	CAAT-box
Gohir.D07G208500.1	1380	1385	CAAT-box
Gohir.D07G208500.1	1381	1385	CAAT-box
Gohir.D07G208500.1	22	28	W box
Gohir.D07G208500.1	801	807	W box
Gohir.D07G208500.1	1115	1121	TCT-motif
Gohir.D07G208500.1	43	49	ARE
Gohir.D07G208500.1	235	241	ARE
Gohir.D07G208500.1	572	578	ARE
Gohir.D07G208500.1	844	850	ARE
Gohir.D07G208500.1	108	114	MYC
Gohir.D07G208500.1	392	398	MYC
Gohir.D07G208500.1	483	489	MYC
Gohir.D07G208500.1	509	515	MYC
Gohir.D07G208500.1	594	600	MYC
Gohir.D07G208500.1	602	608	MYC
Gohir.D07G208500.1	873	879	MYC
Gohir.D07G208500.1	851	857	ABRE4
Gohir.D07G208500.1	156	160	TATA-box
Gohir.D07G208500.1	176	183	TATA-box
Gohir.D07G208500.1	178	184	TATA-box
Gohir.D07G208500.1	180	185	TATA-box
Gohir.D07G208500.1	186	190	TATA-box
Gohir.D07G208500.1	411	417	TATA-box
Gohir.D07G208500.1	419	423	TATA-box
Gohir.D07G208500.1	495	503	TATA-box
Gohir.D07G208500.1	609	616	TATA-box
Gohir.D07G208500.1	611	617	TATA-box
Gohir.D07G208500.1	613	618	TATA-box
Gohir.D07G208500.1	619	623	TATA-box
Gohir.D07G208500.1	625	632	TATA-box
Gohir.D07G208500.1	627	633	TATA-box
Gohir.D07G208500.1	629	634	TATA-box
Gohir.D07G208500.1	635	639	TATA-box
Gohir.D07G208500.1	642	648	TATA-box
Gohir.D07G208500.1	638	643	TATA-box
Gohir.D07G208500.1	644	648	TATA-box
Gohir.D07G208500.1	655	667	TATA-box
Gohir.D07G208500.1	669	675	TATA-box
Gohir.D07G208500.1	670	674	TATA-box
Gohir.D07G208500.1	678	686	TATA-box
Gohir.D07G208500.1	694	706	TATA-box
Gohir.D07G208500.1	708	714	TATA-box
Gohir.D07G208500.1	709	713	TATA-box
Gohir.D07G208500.1	720	724	TATA-box
Gohir.D07G208500.1	727	733	TATA-box
Gohir.D07G208500.1	728	732	TATA-box
Gohir.D07G208500.1	739	746	TATA-box
Gohir.D07G208500.1	741	747	TATA-box
Gohir.D07G208500.1	743	748	TATA-box
Gohir.D07G208500.1	749	753	TATA-box
Gohir.D07G208500.1	756	762	TATA-box
Gohir.D07G208500.1	752	757	TATA-box
Gohir.D07G208500.1	754	758	TATA-box
Gohir.D07G208500.1	886	892	TATA-box
Gohir.D07G208500.1	882	887	TATA-box
Gohir.D07G208500.1	884	888	TATA-box
Gohir.D07G208500.1	903	912	TATA-box
Gohir.D07G208500.1	901	905	TATA-box
Gohir.D07G208500.1	923	929	TATA-box
Gohir.D07G208500.1	919	924	TATA-box
Gohir.D07G208500.1	921	925	TATA-box
Gohir.D07G208500.1	946	953	TATA-box
Gohir.D07G208500.1	948	954	TATA-box
Gohir.D07G208500.1	950	955	TATA-box
Gohir.D07G208500.1	952	956	TATA-box
Gohir.D07G208500.1	966	973	TATA-box
Gohir.D07G208500.1	968	974	TATA-box
Gohir.D07G208500.1	970	975	TATA-box
Gohir.D07G208500.1	972	976	TATA-box
Gohir.D07G208500.1	1007	1013	TATA-box
Gohir.D07G208500.1	1009	1014	TATA-box
Gohir.D07G208500.1	1011	1015	TATA-box
Gohir.D07G208500.1	1016	1022	TATA-box
Gohir.D07G208500.1	1017	1023	TATA-box
Gohir.D07G208500.1	1018	1024	TATA-box
Gohir.D07G208500.1	1021	1025	TATA-box
Gohir.D07G208500.1	1036	1042	TATA-box
Gohir.D07G208500.1	1039	1043	TATA-box
Gohir.D07G208500.1	1054	1063	TATA-box
Gohir.D07G208500.1	1059	1066	TATA-box
Gohir.D07G208500.1	1061	1067	TATA-box
Gohir.D07G208500.1	1063	1068	TATA-box
Gohir.D07G208500.1	1065	1069	TATA-box
Gohir.D07G208500.1	1232	1240	TATA-box
Gohir.D07G208500.1	1353	1361	TATA-box
Gohir.D07G208500.1	1347	1355	TATA-box
Gohir.D07G208500.1	225	234	TCA-element
Gohir.D07G208500.1	1081	1090	TCA-element
Gohir.D07G208500.1	317	325	ERE
Gohir.D07G208500.1	672	680	ERE
Gohir.D07G208500.1	1046	1054	ERE
Gohir.D07G208500.1	1316	1324	ERE
Gohir.D07G208500.1	775	781	GT1-motif
Gohir.D07G208500.1	788	794	GT1-motif
Gohir.D07G208500.1	1209	1215	GT1-motif
Gohir.D07G208500.1	1487	1493	GT1-motif
Gohir.D07G208500.1	845	851	ABRE3a
Gohir.D07G208500.1	927	936	AT-rich sequence
Gohir.D07G208500.1	1325	1333	chs-CMA1a
Gohir.D07G208500.1	523	529	MYB
Gohir.D07G208500.1	588	594	MYB
Gohir.D07G208500.1	782	788	MYB
Gohir.D07G208500.1	1169	1175	MYB
Gohir.D07G208500.1	1494	1500	MYB
Gohir.D07G208500.1	523	529	Myb-binding site
Gohir.D07G208500.1	971	980	AAGAA-motif
Gohir.D07G208500.1	782	788	MYB-like sequence
Gohir.D07G208500.1	1169	1175	MYB-like sequence
Gohir.D07G208500.1	1494	1500	MYB-like sequence
Gohir.D07G208500.1	623	631	TATA
Gohir.D07G208500.1	644	652	TATA
Gohir.D07G208500.1	758	766	TATA
Gohir.D07G208500.1	925	933	TATA
Gohir.D07G208500.1	964	972	TATA
Gohir.D07G208500.1	1069	1077	TATA
Gohir.D07G208500.1	456	461	STRE
Gohir.D07G208500.1	546	552	Myb
Gohir.D07G208500.1	798	804	MYB recognition site
Gohir.D07G208500.1	846	851	ABRE
Gohir.D07G208500.1	871	880	ABRE
Gohir.D07G208500.1	1017	1023	AT~TATA-box
Gohir.D07G208500.1	845	851	G-box
Gohir.D07G208500.1	792	798	CCAAT-box
Gohir.D08G210800.1	1167	1173	Box 4
Gohir.D08G210800.1	1178	1184	Box 4
Gohir.D08G210800.1	1197	1203	Box 4
Gohir.D08G210800.1	1262	1268	G-box
Gohir.D08G210800.1	206	212	MBS
Gohir.D08G210800.1	1485	1491	CCAAT-box
Gohir.D08G210800.1	811	820	GATA-motif
Gohir.D08G210800.1	865	872	TCCC-motif
Gohir.D08G210800.1	1263	1268	ABRE
Gohir.D08G210800.1	357	363	AT~TATA-box
Gohir.D08G210800.1	984	990	AT~TATA-box
Gohir.D08G210800.1	986	992	AT~TATA-box
Gohir.D08G210800.1	1491	1497	MYB recognition site
Gohir.D08G210800.1	206	212	Myb
Gohir.D08G210800.1	1358	1364	Myb
Gohir.D08G210800.1	711	717	LTR
Gohir.D08G210800.1	1083	1089	LTR
Gohir.D08G210800.1	62	67	TGACG-motif
Gohir.D08G210800.1	1380	1385	TGACG-motif
Gohir.D08G210800.1	83	92	I-box
Gohir.D08G210800.1	612	622	I-box
Gohir.D08G210800.1	732	742	I-box
Gohir.D08G210800.1	237	242	STRE
Gohir.D08G210800.1	1439	1444	STRE
Gohir.D08G210800.1	192	201	ATC-motif
Gohir.D08G210800.1	29	38	O2-site
Gohir.D08G210800.1	226	233	P-box
Gohir.D08G210800.1	801	808	P-box
Gohir.D08G210800.1	814	823	AAGAA-motif
Gohir.D08G210800.1	1438	1444	MYB-like sequence
Gohir.D08G210800.1	1457	1463	MYB-like sequence
Gohir.D08G210800.1	1466	1472	MYB-like sequence
Gohir.D08G210800.1	64	72	TATA
Gohir.D08G210800.1	614	620	MYB
Gohir.D08G210800.1	1438	1444	MYB
Gohir.D08G210800.1	1457	1463	MYB
Gohir.D08G210800.1	1466	1472	MYB
Gohir.D08G210800.1	1262	1268	ABRE3a
Gohir.D08G210800.1	1405	1411	CAT-box
Gohir.D08G210800.1	485	493	chs-CMA1a
Gohir.D08G210800.1	1445	1451	GT1-motif
Gohir.D08G210800.1	1450	1456	GT1-motif
Gohir.D08G210800.1	821	830	WUN-motif
Gohir.D08G210800.1	519	525	MYC
Gohir.D08G210800.1	62	67	as-1
Gohir.D08G210800.1	1380	1385	as-1
Gohir.D08G210800.1	1268	1274	ABRE4
Gohir.D08G210800.1	1	7	TATA-box
Gohir.D08G210800.1	2	6	TATA-box
Gohir.D08G210800.1	42	50	TATA-box
Gohir.D08G210800.1	48	53	TATA-box
Gohir.D08G210800.1	54	58	TATA-box
Gohir.D08G210800.1	63	72	TATA-box
Gohir.D08G210800.1	66	73	TATA-box
Gohir.D08G210800.1	68	74	TATA-box
Gohir.D08G210800.1	70	75	TATA-box
Gohir.D08G210800.1	76	80	TATA-box
Gohir.D08G210800.1	127	135	TATA-box
Gohir.D08G210800.1	276	285	TATA-box
Gohir.D08G210800.1	277	283	TATA-box
Gohir.D08G210800.1	278	282	TATA-box
Gohir.D08G210800.1	327	335	TATA-box
Gohir.D08G210800.1	349	355	TATA-box
Gohir.D08G210800.1	345	350	TATA-box
Gohir.D08G210800.1	351	355	TATA-box
Gohir.D08G210800.1	349	355	TATA-box
Gohir.D08G210800.1	357	363	TATA-box
Gohir.D08G210800.1	358	364	TATA-box
Gohir.D08G210800.1	359	363	TATA-box
Gohir.D08G210800.1	366	375	TATA-box
Gohir.D08G210800.1	367	373	TATA-box
Gohir.D08G210800.1	368	372	TATA-box
Gohir.D08G210800.1	392	399	TATA-box
Gohir.D08G210800.1	394	400	TATA-box
Gohir.D08G210800.1	396	401	TATA-box
Gohir.D08G210800.1	402	406	TATA-box
Gohir.D08G210800.1	419	423	TATA-box
Gohir.D08G210800.1	484	492	TATA-box
Gohir.D08G210800.1	531	537	TATA-box
Gohir.D08G210800.1	532	536	TATA-box
Gohir.D08G210800.1	533	540	TATA-box
Gohir.D08G210800.1	535	541	TATA-box
Gohir.D08G210800.1	537	542	TATA-box
Gohir.D08G210800.1	543	547	TATA-box
Gohir.D08G210800.1	592	596	TATA-box
Gohir.D08G210800.1	603	610	TATA-box
Gohir.D08G210800.1	681	690	TATA-box
Gohir.D08G210800.1	704	708	TATA-box
Gohir.D08G210800.1	845	853	TATA-box
Gohir.D08G210800.1	851	856	TATA-box
Gohir.D08G210800.1	853	857	TATA-box
Gohir.D08G210800.1	909	915	TATA-box
Gohir.D08G210800.1	913	917	TATA-box
Gohir.D08G210800.1	988	994	TATA-box
Gohir.D08G210800.1	982	989	TATA-box
Gohir.D08G210800.1	984	990	TATA-box
Gohir.D08G210800.1	985	991	TATA-box
Gohir.D08G210800.1	986	992	TATA-box
Gohir.D08G210800.1	987	993	TATA-box
Gohir.D08G210800.1	990	994	TATA-box
Gohir.D08G210800.1	996	1004	TATA-box
Gohir.D08G210800.1	1008	1014	TATA-box
Gohir.D08G210800.1	1005	1009	TATA-box
Gohir.D08G210800.1	1207	1213	TATA-box
Gohir.D08G210800.1	1204	1208	TATA-box
Gohir.D08G210800.1	1234	1240	TATA-box
Gohir.D08G210800.1	1231	1235	TATA-box
Gohir.D08G210800.1	1258	1262	TATA-box
Gohir.D08G210800.1	1352	1356	TATA-box
Gohir.D08G210800.1	362	370	ERE
Gohir.D08G210800.1	866	875	Box II
Gohir.D08G210800.1	57	62	CGTCA-motif
Gohir.D08G210800.1	1385	1390	CGTCA-motif
Gohir.D08G210800.1	720	726	W box
Gohir.D08G210800.1	761	767	TCT-motif
Gohir.D08G210800.1	47	56	TC-rich repeats
Gohir.D08G210800.1	434	443	TC-rich repeats
Gohir.D08G210800.1	116	120	CAAT-box
Gohir.D08G210800.1	120	124	CAAT-box
Gohir.D08G210800.1	179	183	CAAT-box
Gohir.D08G210800.1	198	203	CAAT-box
Gohir.D08G210800.1	199	203	CAAT-box
Gohir.D08G210800.1	271	276	CAAT-box
Gohir.D08G210800.1	306	311	CAAT-box
Gohir.D08G210800.1	341	346	CAAT-box
Gohir.D08G210800.1	381	385	CAAT-box
Gohir.D08G210800.1	457	462	CAAT-box
Gohir.D08G210800.1	473	477	CAAT-box
Gohir.D08G210800.1	481	485	CAAT-box
Gohir.D08G210800.1	515	520	CAAT-box
Gohir.D08G210800.1	547	552	CAAT-box
Gohir.D08G210800.1	562	566	CAAT-box
Gohir.D08G210800.1	597	602	CAAT-box
Gohir.D08G210800.1	634	638	CAAT-box
Gohir.D08G210800.1	898	902	CAAT-box
Gohir.D08G210800.1	909	913	CAAT-box
Gohir.D08G210800.1	927	931	CAAT-box
Gohir.D08G210800.1	934	939	CAAT-box
Gohir.D08G210800.1	1106	1111	CAAT-box
Gohir.D08G210800.1	1139	1144	CAAT-box
Gohir.D08G210800.1	1154	1159	CAAT-box
Gohir.D08G210800.1	1155	1159	CAAT-box
Gohir.D08G210800.1	1171	1175	CAAT-box
Gohir.D08G210800.1	1191	1196	CAAT-box
Gohir.D08G210800.1	1199	1203	CAAT-box
Gohir.D08G210800.1	1243	1248	CAAT-box
Gohir.D08G210800.1	1249	1254	CAAT-box
Gohir.D08G210800.1	1250	1254	CAAT-box
Gohir.D08G210800.1	1298	1302	CAAT-box
Gohir.D08G210800.1	1340	1344	CAAT-box
Gohir.D08G210800.1	1416	1420	CAAT-box
Gohir.D09G053074.1	606	612	G-box
Gohir.D09G053074.1	866	872	Box 4
Gohir.D09G053074.1	1082	1088	Box 4
Gohir.D09G053074.1	1472	1478	Box 4
Gohir.D09G053074.1	1479	1485	Box 4
Gohir.D09G053074.1	1136	1145	GATA-motif
Gohir.D09G053074.1	1431	1437	AT~TATA-box
Gohir.D09G053074.1	132	137	ABRE
Gohir.D09G053074.1	328	333	ABRE
Gohir.D09G053074.1	607	612	ABRE
Gohir.D09G053074.1	948	954	Myb
Gohir.D09G053074.1	421	426	TGACG-motif
Gohir.D09G053074.1	234	239	STRE
Gohir.D09G053074.1	364	369	STRE
Gohir.D09G053074.1	586	591	STRE
Gohir.D09G053074.1	1138	1143	STRE
Gohir.D09G053074.1	799	806	P-box
Gohir.D09G053074.1	993	1000	P-box
Gohir.D09G053074.1	1394	1402	TATA
Gohir.D09G053074.1	647	653	MYB-like sequence
Gohir.D09G053074.1	114	121	AAGAA-motif
Gohir.D09G053074.1	1208	1215	AAGAA-motif
Gohir.D09G053074.1	875	883	chs-CMA2a
Gohir.D09G053074.1	864	872	LAMP-element
Gohir.D09G053074.1	1080	1088	LAMP-element
Gohir.D09G053074.1	360	366	Myb-binding site
Gohir.D09G053074.1	620	626	Myb-binding site
Gohir.D09G053074.1	360	366	MYB
Gohir.D09G053074.1	620	626	MYB
Gohir.D09G053074.1	647	653	MYB
Gohir.D09G053074.1	137	143	G-Box
Gohir.D09G053074.1	333	339	G-Box
Gohir.D09G053074.1	606	612	ABRE3a
Gohir.D09G053074.1	1279	1285	GT1-motif
Gohir.D09G053074.1	600	606	ABRE4
Gohir.D09G053074.1	421	426	as-1
Gohir.D09G053074.1	570	576	MYC
Gohir.D09G053074.1	1161	1167	MYC
Gohir.D09G053074.1	1369	1375	MYC
Gohir.D09G053074.1	180	186	ARE
Gohir.D09G053074.1	239	245	ARE
Gohir.D09G053074.1	1167	1173	ARE
Gohir.D09G053074.1	405	414	TCA-element
Gohir.D09G053074.1	1452	1459	AuxRR-core
Gohir.D09G053074.1	103	107	TATA-box
Gohir.D09G053074.1	841	847	TATA-box
Gohir.D09G053074.1	845	849	TATA-box
Gohir.D09G053074.1	853	859	TATA-box
Gohir.D09G053074.1	849	854	TATA-box
Gohir.D09G053074.1	851	855	TATA-box
Gohir.D09G053074.1	980	984	TATA-box
Gohir.D09G053074.1	1131	1137	TATA-box
Gohir.D09G053074.1	1128	1132	TATA-box
Gohir.D09G053074.1	1235	1239	TATA-box
Gohir.D09G053074.1	1382	1390	TATA-box
Gohir.D09G053074.1	1388	1393	TATA-box
Gohir.D09G053074.1	1390	1394	TATA-box
Gohir.D09G053074.1	1431	1437	TATA-box
Gohir.D09G053074.1	1438	1444	TATA-box
Gohir.D09G053074.1	1435	1439	TATA-box
Gohir.D09G053074.1	416	421	CGTCA-motif
Gohir.D09G053074.1	1045	1051	W box
Gohir.D09G053074.1	116	120	CAAT-box
Gohir.D09G053074.1	207	212	CAAT-box
Gohir.D09G053074.1	208	212	CAAT-box
Gohir.D09G053074.1	308	313	CAAT-box
Gohir.D09G053074.1	309	313	CAAT-box
Gohir.D09G053074.1	460	464	CAAT-box
Gohir.D09G053074.1	570	574	CAAT-box
Gohir.D09G053074.1	568	572	CAAT-box
Gohir.D09G053074.1	674	678	CAAT-box
Gohir.D09G053074.1	679	684	CAAT-box
Gohir.D09G053074.1	694	698	CAAT-box
Gohir.D09G053074.1	706	710	CAAT-box
Gohir.D09G053074.1	870	874	CAAT-box
Gohir.D09G053074.1	886	891	CAAT-box
Gohir.D09G053074.1	1054	1058	CAAT-box
Gohir.D09G053074.1	1086	1090	CAAT-box
Gohir.D09G053074.1	1099	1104	CAAT-box
Gohir.D09G053074.1	1098	1102	CAAT-box
Gohir.D09G053074.1	1128	1133	CAAT-box
Gohir.D09G053074.1	1157	1162	CAAT-box
Gohir.D09G053074.1	1200	1204	CAAT-box
Gohir.D09G053074.1	1243	1248	CAAT-box
Gohir.D09G053074.1	1265	1269	CAAT-box
Gohir.D09G053074.1	1312	1316	CAAT-box
Gohir.D09G053074.1	1365	1370	CAAT-box
Gohir.D09G053074.1	1453	1457	CAAT-box
Gohir.D09G053074.1	1464	1468	CAAT-box
