# Supplementary material for: Genome-wide identification and characterization of the CLASP_N gene family in upland cotton (Gossypium hirsutum L.)
Source: PeerJ. 2022 Jan 3;10:e12733. doi: 10.7717/peerj.12733 (PMC8734470; doi:10.7717/peerj.12733)
Supplement: Supplemental Information 5 [file peerj-10-12733-s005.xlsx]

## Sheet: Sheet1
Table S5 The Ct value of qPCR raw data.
	Actin			D07G160250
	Rep-1	Rep-2	Rep-3	Rep-1	Rep-2	Rep-3
Leaf	19.7566	19.6372	19.6684	27.7622	28.5929	28.2679
Fiber-17DPA	21.6134	21.1874	21.4606	25.7712	25.6947	25.5683
Fiber-21DPA	20.2735	20.2849	20.4176	30.9341	30.0548	30.789
	Actin			D07G20850
	Rep-1	Rep-2	Rep-3	Rep-1	Rep-2	Rep-3
Leaf	19.7566	19.6372	19.6684	25.0727	25.0071	25.0105
Fiber-17DPA	21.6134	21.1874	21.4606	25.3804	25.2111	25.1662
Fiber-21DPA	20.2735	20.2849	20.4176	25.0938	25.3844	25.1753
	Actin			D01G140100
	Rep-1	Rep-2	Rep-3	Rep-1	Rep-2	Rep-3
Leaf	19.7566	19.6372	19.6684	25.2486	25.4349	25.2301
Fiber-17DPA	21.6134	21.1874	21.4606	27.3895	26.9137	26.8597
Fiber-21DPA	20.2735	20.2849	20.4176	27.0785	27.3375	27.546
	Actin			D08G210800
	Rep-1	Rep-2	Rep-3	Rep-1	Rep-2	Rep-3
Leaf	19.7566	19.6372	19.6684	25.6003	25.5838	25.3236
Fiber-17DPA	21.6134	21.1874	21.4606	25.3961	25.3334	25.1927
Fiber-21DPA	20.2735	20.2849	20.4176	24.4384	24.5228	24.2237
	Actin			D04G186000
	Rep-1	Rep-2	Rep-3	Rep-1	Rep-2	Rep-3
Leaf	19.7566	19.6372	19.6684	26.6169	27.4097	26.4121
Fiber-17DPA	21.6134	21.1874	21.4606	27.0124	26.3099	26.3386
Fiber-21DPA	20.2735	20.2849	20.4176	29.6555	30.8423	30.4056
	Actin			D05G309600
	Rep-1	Rep-2	Rep-3	Rep-1	Rep-2	Rep-3
Leaf	19.7566	19.6372	19.6684	24.9328	25.364	25.104
Fiber-17DPA	21.6134	21.1874	21.4606	26.6166	26.8999	26.7688
Fiber-21DPA	20.2735	20.2849	20.4176	28.3224	28.1218	28.8849
	Actin			A07G154000
	Rep-1	Rep-2	Rep-3	Rep-1	Rep-2	Rep-3
Leaf	19.7566	19.6372	19.6684	26.9838	27.9756	26.6445
Fiber-17DPA	21.6134	21.1874	21.4606	25.9785	25.8488	25.88
Fiber-21DPA	20.2735	20.2849	20.4176	25.9584	25.6871	25.7714
	Actin			A07G202300
	Rep-1	Rep-2	Rep-3	Rep-1	Rep-2	Rep-3
Leaf	19.7566	19.6372	19.6684	26.3682	25.6593	25.8767
Fiber-17DPA	21.6134	21.1874	21.4606	23.1609	23.1526	24.9282
Fiber-21DPA	20.2735	20.2849	20.4176	24.8719	24.7603	24.8331
	Actin			A08G192800
	Rep-1	Rep-2	Rep-3	Rep-1	Rep-2	Rep-3
Leaf	19.7566	19.6372	19.6684	25.0037	24.4196	24.3256
Fiber-17DPA	21.6134	21.1874	21.4606	24.4755	24.2358	24.9455
Fiber-21DPA	20.2735	20.2849	20.4176	27.3486	26.6969	26.7367
	Actin			A01G147000
	Rep-1	Rep-2	Rep-3	Rep-1	Rep-2	Rep-3
Leaf	19.7566	19.6372	19.6684	25.6519	25.5978	25.2472
Fiber-17DPA	21.6134	21.1874	21.4606	26.7463	26.8657	26.2373
Fiber-21DPA	20.2735	20.2849	20.4176	28.1323	28.4684	28.9375
	Actin			A12G152100
	Rep-1	Rep-2	Rep-3	Rep-1	Rep-2	Rep-3
Leaf	19.7566	19.6372	19.6684	26.5499	26.2354	26.562
Fiber-17DPA	21.6134	21.1874	21.4606	27.7607	27.8282	28.0749
Fiber-21DPA	20.2735	20.2849	20.4176	30.7099	30.3029	30.7233
